# Supplementary material for: Structural Elucidation and Cytotoxic Activity of New Monoterpenoid Indoles from Gelsemium elegans
Source: MDPI journal article supplement (doi:10.3390/molecules28062531), 2023-03-10
Supplement: s1 [file s1]

# Structural elucidation of new monoterpenoid indoles from *Gelsemium elegans* using quantum chemical calculations and their antitumor activities

Da Song,<sup>a,b,1</sup> Jia-Jun Liang,<sup>a,1</sup> Shi-Biao Pu,<sup>c,1</sup> Pan-Pan Zhang,<sup>a</sup> Yun-Lin Peng,<sup>a</sup> Xia Liu,<sup>a</sup> Ting-Ting Feng,<sup>a</sup> Xiang Pu,<sup>a</sup> Ying Zhou,<sup>a</sup> Xiong-Wei Liu<sup>a,\*</sup> and Xin Wei<sup>a,\*</sup>

<sup>a</sup>*School of Pharmacy, Guizhou University of Traditional Chinese Medicine, Guiyang 550025, People's Republic of China.*

<sup>b</sup>*School of Humanities and Management, Guizhou University of Traditional Chinese Medicine, Guiyang 550025, People's Republic of China.*

<sup>c</sup>*College of Chinese Materia Medica, Yunnan University of Chinese Medicine, Kunming, 650500, People's Republic of China.*

---

\*Corresponding author: [ashevyo819@163.com](mailto:ashevyo819@163.com) (X.-W. Liu); [sfweixin@163.com](mailto:sfweixin@163.com) (X. Wei).

<sup>1</sup>These authors contributed equally to this work.

## Table of contents

|                                                                                                      |    |
|------------------------------------------------------------------------------------------------------|----|
| 1. Experimental and computed $^{13}\text{C}$ -NMR chemical shifts.....                               | 1  |
| 2. ECD calculations of 1 and 2 .....                                                                 | 3  |
| 2.1. Computational methods.....                                                                      | 3  |
| 2.2. Energies and coordinates .....                                                                  | 5  |
| 2.3. Experimental and calculated ECD spectra of 1 and 2 .....                                        | 13 |
| 3. Supplementary figures.....                                                                        | 13 |
| Figure S6. $^1\text{H}$ NMR spectrum of 1 ( $\text{CD}_3\text{OD}$ , 400 MHz).....                   | 14 |
| Figure S7. $^{13}\text{C}$ NMR spectrum of 1 ( $\text{CD}_3\text{OD}$ , 100 MHz).....                | 15 |
| Figure S8. HSQC spectrum of 1 ( $\text{CD}_3\text{OD}$ , 400 MHz). ....                              | 16 |
| Figure S9. HMBC spectrum of 1 ( $\text{CD}_3\text{OD}$ , 400 MHz). ....                              | 17 |
| Figure S10. ROESY spectrum of 1 ( $\text{CD}_3\text{OD}$ , 400 MHz). ....                            | 18 |
| Figure S11. $^1\text{H}$ - $^1\text{H}$ COSY spectrum of 1 ( $\text{CD}_3\text{OD}$ , 400 MHz). .... | 19 |
| Figure S12. HR-ESI-MS spectrum of 1 .....                                                            | 20 |
| Figure S13. ORD spectrum of 1 .....                                                                  | 21 |
| Figure S14. UV spectrum of 1 .....                                                                   | 22 |
| Figure S15. IR spectrum of 1 .....                                                                   | 23 |
| Figure S16. ECD spectrum of 1 .....                                                                  | 24 |
| Figure S17. $^1\text{H}$ NMR spectrum of 2 ( $\text{CD}_3\text{OD}$ , 400 MHz).....                  | 25 |
| Figure S18. $^{13}\text{C}$ NMR spectrum of 2 ( $\text{CD}_3\text{OD}$ , 100 MHz).....               | 26 |
| Figure S19. HSQC spectrum of 2 ( $\text{CD}_3\text{OD}$ , 400 MHz). ....                             | 27 |
| Figure S20. HMBC spectrum of 2 ( $\text{CD}_3\text{OD}$ , 400 MHz). ....                             | 28 |
| Figure S21. ROESY spectrum of 2 ( $\text{CD}_3\text{OD}$ , 400 MHz). ....                            | 29 |
| Figure S22. $^1\text{H}$ - $^1\text{H}$ spectrum of 2 ( $\text{CD}_3\text{OD}$ , 400 MHz). ....      | 30 |
| Figure S23. HR-ESI-MS spectrum of 2 .....                                                            | 31 |
| Figure S24. ORD spectrum of 2 .....                                                                  | 32 |
| Figure S25. UV spectrum of 2.....                                                                    | 33 |
| Figure S26. IR spectrum of 2 .....                                                                   | 34 |
| Figure S27. ECD spectrum of 2 .....                                                                  | 35 |
| References.....                                                                                      | 35 |

## 1. Experimental and computed $^{13}\text{C}$ -NMR chemical shifts

The TMS-corrected computed  $^{13}\text{C}$ -NMR chemical shifts of compounds **1** and **2** were fitted to the experimental values by Ordinary Least Squares (OLS) Linear Regression method in order to remove systematic error that results from the conformational search and random error from experimental conditions (**Tables S1-S3**).

**Table S1** Experimental and computed  $^{13}\text{C}$ -NMR chemical shifts of **1**.

| Position                   | Experimental | calculated  |
|----------------------------|--------------|-------------|
| 2                          | 174.9        | 174.7056359 |
| 3                          | 74.1         | 73.77670849 |
| 5                          | 71.0         | 72.20161502 |
| 6                          | 29.4         | 30.0031432  |
| 7                          | 57.0         | 58.48536649 |
| 8                          | 131.2        | 131.5162235 |
| 9                          | 126.8        | 124.9741055 |
| 10                         | 124.8        | 123.6012893 |
| 11                         | 130.0        | 129.2364188 |
| 12                         | 108.7        | 107.2296033 |
| 13                         | 139.5        | 138.4664691 |
| 14                         | 27.8         | 26.33057925 |
| 15                         | 34.5         | 36.15480094 |
| 16                         | 33.1         | 34.37886398 |
| 17                         | 65.6         | 64.24414924 |
| 18                         | 13.4         | 12.94679213 |
| 19                         | 130.8        | 135.4254288 |
| 20                         | 130.0        | 129.5051204 |
| 21                         | 54.7         | 55.79416295 |
| 22                         | 69.4         | 74.20490931 |
| <i>N</i> <sub>2</sub> -OMe | 64.3         | 60.59474299 |
| <i>N</i> <sub>4</sub> -Me  | 48.6         | 45.82387137 |

**Table S2** Experimental and computed  $^{13}\text{C}$ -NMR chemical shifts of **2**.

| Position | Experimental | calculated  |
|----------|--------------|-------------|
| 2        | 131.2        | 130.5271157 |
| 3        | 61.6         | 61.3739485  |
| 5        | 67.4         | 65.54997428 |
| 6        | 21.1         | 18.97712099 |
| 7        | 103.9        | 102.6619612 |
| 8        | 126.7        | 125.032549  |
| 9        | 119.5        | 118.7670812 |
| 10       | 121.2        | 120.6764227 |
| 11       | 124.3        | 123.8913627 |

|       |       |             |
|-------|-------|-------------|
| 12    | 112.9 | 111.3440135 |
| 13    | 139.1 | 136.7802114 |
| 14    | 31.3  | 32.93263895 |
| 15    | 35.9  | 38.85662307 |
| 16    | 53.3  | 54.0289765  |
| 17    | 67.5  | 66.92161865 |
| 18    | 13.0  | 11.5087365  |
| 19    | 122.9 | 123.0622    |
| 20    | 128.4 | 130.5439096 |
| 21    | 60.2  | 61.01637075 |
| 22    | 67.8  | 72.73629931 |
| COOMe | 171.7 | 174.3550486 |
| COOMe | 52.7  | 52.05581688 |

Relatively higher  $R^2$  and lower CMAD and CLAD values were shown in both  $^{13}\text{C}$ -NMR Ordinary Least Squares Linear Regression (OLS-LR) for **1**, which indicated that this configuration was the correct structure.

**Table S3** Statistics of Ordinary Least Squares Linear Regression (OLS-LR) of experimental and computed  $^{13}\text{C}$ -NMR chemical shifts of **1** and **2**.

| Type | Compound | CMAD <sup>a</sup> | CLAD <sup>b</sup> | $R^2$  | $RMSE$ | $F$      | $p$ value | $Slope$ |
|------|----------|-------------------|-------------------|--------|--------|----------|-----------|---------|
| CNMR | <b>1</b> | 1.55              | 4.80              | 0.9980 | 2.1069 | 9962.11  | < 0.01    | 0.9767  |
| CNMR | <b>2</b> | 1.46              | 4.94              | 0.9982 | 1.9124 | 11277.73 | < 0.01    | 0.9898  |

<sup>a</sup> CMAD = corrected mean absolute deviation, computed as  $(1/n) \sum_i^n |\delta_{\text{calc}} - \delta_{\text{exp}}|$ , where  $\delta_{\text{calc}}$

and  $\delta_{\text{exp}}$  refer to the calculated and experimental chemical shifts. <sup>b</sup> CLAD = corrected largest

absolute deviation, computed as  $\max(|\delta_{\text{calc}} - \delta_{\text{exp}}|)$ .

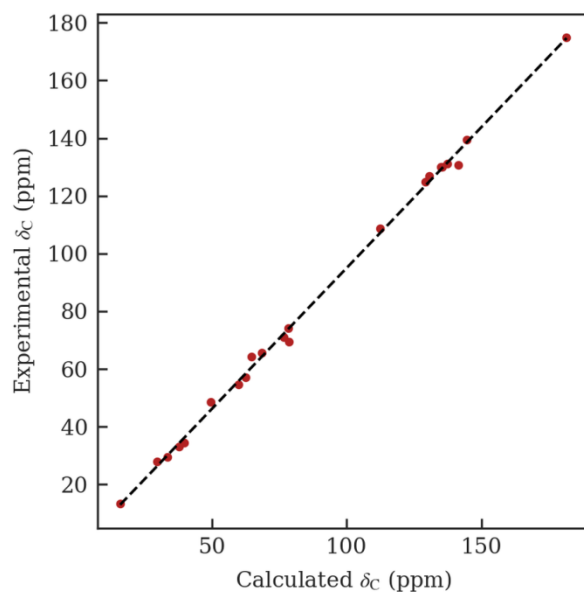

**Figure S1** Regression analysis of experimental versus calculated  $^{13}\text{C}$ - NMR chemical shifts of **1**.

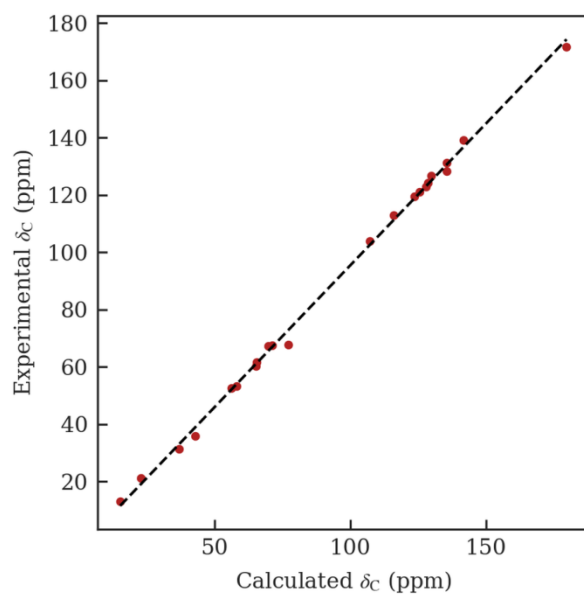

**Figure S2** Regression analysis of experimental versus calculated  $^{13}\text{C}$ - NMR chemical shifts of **2**.

## 2. ECD calculations of **1** and **2**

### 2.1. Computational methods

#### 2.1.1. Conformational analysis

Conformational analysis for **1** and **2** (**Figure S2**) were performed using systematic algorithm by

Confab<sup>1</sup> at MMFF94 force field with RMSD threshold of 0.2 Å and energy window of 7 kcal/mol.

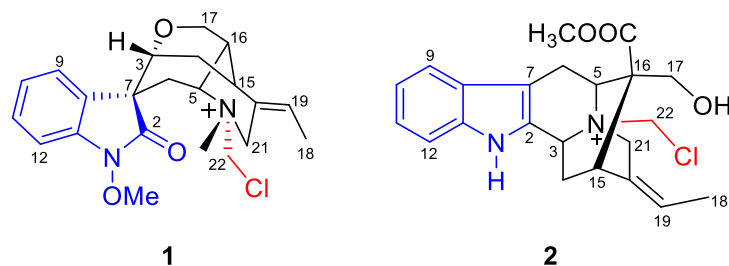

**Figure S3** Chemical structure of compounds **1** and **2**.

### 2.1.2. ECD calculation

The theoretical calculations were carried out using Gaussian 09<sup>2</sup>. At first, all conformers were optimized at PM6, and the net charge was set as one. Room-temperature equilibrium populations were calculated according to Boltzmann distribution law (eq.1), based on which dominative conformers of population over 1% were kept. The chosen conformers were further optimized at B3LYP/6-31G(d,p) in gas phase. Vibrational frequency analysis confirmed the stable structures. ECD calculations were conducted at B3LYP/6-311G(d,p) level in methanol with IEFPCM model using Time-dependent Density functional theory (TD-DFT). Rotatory strengths for 30 excited states were calculated (**Tables S4** and **S5**). The ECD spectrum was simulated using the ECD/UV analysis tool by overlapping Gaussian functions for each transition according to (eq.2).

$$\frac{N_i}{N} = \frac{g_i e^{-\frac{E_i}{k_B T}}}{\sum g_i e^{-\frac{E_i}{k_B T}}} \quad (\text{eq.3})$$

where  $N_i$  is the number of conformer  $i$  with energy  $E_i$  and degeneracy  $g_i$  at temperature  $T$ , and  $k_B$  is Boltzmann constant.

$$\Delta\epsilon(E) = \frac{1}{2.297 \times 10^{-39}} \times \frac{1}{\sqrt{2\pi\sigma}} \sum_i \Delta E_i R_i e^{-\left(\frac{E-E_i}{2\sigma}\right)^2} \quad (\text{eq.4})$$

where  $\sigma$  represents the width of the band at  $1/e$  height, while  $\Delta E_i$  and  $R_i$  are the excitation energies and rotatory strengths for transition  $i$ , respectively. The  $\sigma$  and UV-shift values were set 0.27 eV and -22 nm, respectively. The spectrum of the enantiomers were produced directly by mirror inversion about the horizontal axis.

### 2.1.3. NMR calculation

The structures were directly derived from the previous ECD calculations. NMR calculations were carried out using the Gauge-Including Atomic Orbitals (GIAO) method at mPW1PW91/6-311+G(2d,p) level in Methanol simulated by the IEFPCM model. The TMS-corrected NMR chemical shift values were averaged according to Boltzmann distribution and fitted to the experimental values by linear regression. The calculated <sup>13</sup>C-NMR chemical shift values of TMS in Methanol were 187.37 ppm, respectively.

## 2.2. Energies and coordinates

### 2.2.1. Energies at B3LYP theory level

Structures for ECD calculation were shown in **Tables S4** and **S5**.

**Table S4** Energies of configuration **1** at B3LYP/6-311G(d,p) in methanol.

| Conformer | Structure                                                                         | E (Hartree)  | E (kcal/mol) | Population (%) |
|-----------|-----------------------------------------------------------------------------------|--------------|--------------|----------------|
| 1a        | 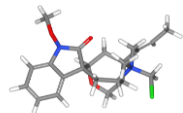 | -1650.644342 | -1035794.954 | 54.35          |
| 1b        |  | -1650.643342 | -1035794.327 | 18.85          |
| 1c        |  | -1650.643674 | -1035794.536 | 26.81          |

**Table S5** Energies of configuration **2** at B3LYP/6-311G(d,p) in methanol.

| Conformer | Structure                                                                           | E (Hartree)  | E (kcal/mol) | Population (%) |
|-----------|-------------------------------------------------------------------------------------|--------------|--------------|----------------|
| 2a        | 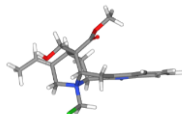 | -1649.512692 | -1035084.833 | 28.99          |
| 2b        |  | -1649.512243 | -1035084.552 | 18.02          |
| 2c        |  | -1649.512894 | -1035084.96  | 35.9           |
| 2d        |  | -1649.512192 | -1035084.52  | 17.08          |

### 2.2.2. Coordinates at B3LYP theory level

**Table S6** Standard orientations of configuration **1** for ECD calculation.**Conformer 1a**

| Center                                                              | Atomic | Atomic | Coordinates (Angstroms) |           |           |
|---------------------------------------------------------------------|--------|--------|-------------------------|-----------|-----------|
| Number                                                              | Number | Type   | X                       | Y         | Z         |
| -----                                                               |        |        |                         |           |           |
| 1                                                                   | 6      | 0      | 4.451669                | -2.373832 | 0.330859  |
| 2                                                                   | 6      | 0      | 5.316991                | -1.412926 | -0.197402 |
| 3                                                                   | 6      | 0      | 4.853633                | -0.140931 | -0.555999 |
| 4                                                                   | 6      | 0      | 3.503550                | 0.106258  | -0.368137 |
| 5                                                                   | 6      | 0      | 2.609471                | -0.841573 | 0.139847  |
| 6                                                                   | 6      | 0      | 3.089253                | -2.092906 | 0.507407  |
| 7                                                                   | 7      | 0      | 2.783730                | 1.291802  | -0.627084 |
| 8                                                                   | 6      | 0      | 1.439695                | 1.157830  | -0.433084 |
| 9                                                                   | 6      | 0      | 1.207792                | -0.230694 | 0.220755  |
| 10                                                                  | 6      | 0      | 0.788313                | -0.130571 | 1.735261  |
| 11                                                                  | 6      | 0      | 0.214214                | -1.088676 | -0.612740 |
| 12                                                                  | 6      | 0      | -0.370776               | 0.815914  | 2.090676  |
| 13                                                                  | 6      | 0      | -1.785339               | 0.197644  | 1.867435  |
| 14                                                                  | 6      | 0      | -2.716802               | 1.099730  | 1.088748  |
| 15                                                                  | 6      | 0      | -2.314421               | 1.262662  | -0.344401 |
| 16                                                                  | 7      | 0      | -2.219029               | -0.098774 | -1.078496 |
| 17                                                                  | 6      | 0      | -1.306318               | -1.132528 | -0.318412 |
| 18                                                                  | 6      | 0      | -1.677540               | -1.184332 | 1.184891  |
| 19                                                                  | 6      | 0      | -3.761960               | 1.723511  | 1.656886  |
| 20                                                                  | 6      | 0      | -4.757834               | 2.661994  | 1.041855  |
| 21                                                                  | 6      | 0      | -0.695047               | -2.056175 | 1.981605  |
| 22                                                                  | 8      | 0      | 0.569805                | -1.444477 | 2.241872  |
| 23                                                                  | 8      | 0      | 0.598284                | 1.997285  | -0.750922 |
| 24                                                                  | 6      | 0      | -3.640584               | -0.624332 | -1.157135 |
| 25                                                                  | 17     | 0      | -3.811155               | -2.156344 | -2.050009 |
| 26                                                                  | 6      | 0      | -1.716495               | 0.177126  | -2.473445 |
| 27                                                                  | 8      | 0      | 3.318561                | 2.304292  | -1.395055 |
| 28                                                                  | 6      | 0      | 3.528131                | 3.499137  | -0.610841 |
| 29                                                                  | 1      | 0      | 4.836565                | -3.349769 | 0.609440  |
| 30                                                                  | 1      | 0      | 6.367764                | -1.650973 | -0.332092 |
| 31                                                                  | 1      | 0      | 5.511185                | 0.614194  | -0.971706 |
| 32                                                                  | 1      | 0      | 2.427783                | -2.839088 | 0.935305  |
| 33                                                                  | 1      | 0      | 1.676972                | 0.216261  | 2.269198  |
| 34                                                                  | 1      | 0      | 0.401579                | -0.936287 | -1.678040 |
| 35                                                                  | 1      | 0      | 0.512571                | -2.126575 | -0.437871 |
| 36                                                                  | 1      | 0      | -0.256103               | 1.756496  | 1.546377  |
| 37                                                                  | 1      | 0      | -0.269980               | 1.060830  | 3.152243  |
| 38                                                                  | 1      | 0      | -2.235711               | 0.011035  | 2.848136  |
| 39                                                                  | 1      | 0      | -3.007458               | 1.868050  | -0.930321 |
| 40                                                                  | 1      | 0      | -1.310272               | 1.686798  | -0.439655 |
| 41                                                                  | 1      | 0      | -1.631582               | -2.071598 | -0.770372 |
| 42                                                                  | 1      | 0      | -2.651242               | -1.682630 | 1.271120  |
| 43                                                                  | 1      | 0      | -3.904261               | 1.555725  | 2.725272  |
| 44                                                                  | 1      | 0      | -4.642400               | 2.794589  | -0.037580 |
| 45                                                                  | 1      | 0      | -5.780003               | 2.313605  | 1.235227  |
| 46                                                                  | 1      | 0      | -4.677597               | 3.653401  | 1.505665  |
| 47                                                                  | 1      | 0      | -1.159000               | -2.284564 | 2.949439  |
| 48                                                                  | 1      | 0      | -0.517624               | -3.014264 | 1.474370  |
| 49                                                                  | 1      | 0      | -4.231594               | 0.131234  | -1.672763 |
| 50                                                                  | 1      | 0      | -4.011743               | -0.760135 | -0.145255 |
| 51                                                                  | 1      | 0      | -2.478442               | 0.756130  | -2.998846 |
| 52                                                                  | 1      | 0      | -0.801337               | 0.761890  | -2.400989 |
| 53                                                                  | 1      | 0      | -1.548904               | -0.763874 | -2.996439 |
| 54                                                                  | 1      | 0      | 4.003235                | 4.195610  | -1.303385 |
| 55                                                                  | 1      | 0      | 2.571804                | 3.903017  | -0.268090 |
| 56                                                                  | 1      | 0      | 4.191761                | 3.296768  | 0.235886  |
| -----                                                               |        |        |                         |           |           |
| Rotational constants (GHZ):                                         |        |        | 0.2764617               | 0.1198577 | 0.110863  |
| Leave Link 202 at Wed Dec 21 11:49:19 2022, MaxMem= 6442450944 cpu: |        |        |                         |           |           |
| (Enter /public1/home/sc81486/software/g09/1301.exe)                 |        |        |                         |           |           |
| Standard basis: 6-311G(2d,p) (5D, 7F)                               |        |        |                         |           |           |



## Conformer 1b

| Center                                              | Atomic | Atomic | Coordinates (Angstroms)          |           |                 |
|-----------------------------------------------------|--------|--------|----------------------------------|-----------|-----------------|
| Number                                              | Number | Type   | X                                | Y         | Z               |
| -----                                               |        |        |                                  |           |                 |
| 1                                                   | 6      | 0      | 4.757243                         | -1.948216 | -0.813706       |
| 2                                                   | 6      | 0      | 5.512484                         | -0.773252 | -0.799529       |
| 3                                                   | 6      | 0      | 4.920006                         | 0.464106  | -0.518548       |
| 4                                                   | 6      | 0      | 3.557640                         | 0.460283  | -0.267384       |
| 5                                                   | 6      | 0      | 2.771706                         | -0.696583 | -0.293356       |
| 6                                                   | 6      | 0      | 3.379104                         | -1.918555 | -0.556159       |
| 7                                                   | 7      | 0      | 2.722036                         | 1.550640  | 0.052577        |
| 8                                                   | 6      | 0      | 1.401403                         | 1.212874  | 0.122320        |
| 9                                                   | 6      | 0      | 1.320385                         | -0.335449 | 0.035247        |
| 10                                                  | 6      | 0      | 0.930395                         | -1.001703 | 1.406885        |
| 11                                                  | 6      | 0      | 0.394332                         | -0.791462 | -1.126790       |
| 12                                                  | 6      | 0      | -0.308982                        | -0.453749 | 2.134932        |
| 13                                                  | 6      | 0      | -1.659856                        | -1.032646 | 1.612456        |
| 14                                                  | 6      | 0      | -2.702463                        | 0.026533  | 1.330796        |
| 15                                                  | 6      | 0      | -2.362562                        | 0.902144  | 0.164862        |
| 16                                                  | 7      | 0      | -2.139575                        | 0.081530  | -1.126035       |
| 17                                                  | 6      | 0      | -1.110077                        | -1.107859 | -0.926182       |
| 18                                                  | 6      | 0      | -1.431798                        | -1.909472 | 0.361685        |
| 19                                                  | 6      | 0      | -3.791327                        | 0.184229  | 2.101960        |
| 20                                                  | 6      | 0      | -4.895041                        | 1.193926  | 1.996115        |
| 21                                                  | 6      | 0      | -0.345256                        | -2.950517 | 0.673075        |
| 22                                                  | 8      | 0      | 0.855502                         | -2.413924 | 1.228378        |
| 23                                                  | 8      | 0      | 0.475806                         | 2.016373  | 0.217872        |
| 24                                                  | 6      | 0      | -3.436394                        | -0.581629 | -1.560081       |
| 25                                                  | 17     | 0      | -4.759236                        | 0.555225  | -1.921691       |
| 26                                                  | 6      | 0      | -1.668414                        | 1.025849  | -2.202004       |
| 27                                                  | 8      | 0      | 3.138017                         | 2.852372  | -0.131161       |
| 28                                                  | 6      | 0      | 3.243447                         | 3.550257  | 1.129301        |
| 29                                                  | 1      | 0      | 5.240974                         | -2.896541 | -1.025484       |
| 30                                                  | 1      | 0      | 6.577345                         | -0.815346 | -1.007398       |
| 31                                                  | 1      | 0      | 5.490880                         | 1.385748  | -0.508095       |
| 32                                                  | 1      | 0      | 2.804533                         | -2.839085 | -0.551240       |
| 33                                                  | 1      | 0      | 1.793104                         | -0.861731 | 2.063509        |
| 34                                                  | 1      | 0      | 0.547039                         | -0.144945 | -1.993594       |
| 35                                                  | 1      | 0      | 0.788621                         | -1.760871 | -1.446374       |
| 36                                                  | 1      | 0      | -0.302316                        | 0.638311  | 2.096737        |
| 37                                                  | 1      | 0      | -0.206823                        | -0.725753 | 3.189733        |
| 38                                                  | 1      | 0      | -2.059386                        | -1.707803 | 2.376642        |
| 39                                                  | 1      | 0      | -3.138088                        | 1.626647  | -0.077162       |
| 40                                                  | 1      | 0      | -1.416377                        | 1.429100  | 0.311311        |
| 41                                                  | 1      | 0      | -1.355111                        | -1.743674 | -1.783067       |
| 42                                                  | 1      | 0      | -2.347461                        | -2.485298 | 0.182036        |
| 43                                                  | 1      | 0      | -3.883567                        | -0.493084 | 2.952349        |
| 44                                                  | 1      | 0      | -4.826194                        | 1.842168  | 1.119214        |
| 45                                                  | 1      | 0      | -5.869267                        | 0.690431  | 1.970161        |
| 46                                                  | 1      | 0      | -4.902193                        | 1.834464  | 2.887463        |
| 47                                                  | 1      | 0      | -0.761441                        | -3.657920 | 1.401564        |
| 48                                                  | 1      | 0      | -0.083827                        | -3.529423 | -0.223758       |
| 49                                                  | 1      | 0      | -3.771782                        | -1.221927 | -0.749395       |
| 50                                                  | 1      | 0      | -3.234245                        | -1.153891 | -2.464425       |
| 51                                                  | 1      | 0      | -2.468545                        | 1.733966  | -2.412294       |
| 52                                                  | 1      | 0      | -0.796318                        | 1.560377  | -1.831354       |
| 53                                                  | 1      | 0      | -1.432735                        | 0.457366  | -3.103926       |
| 54                                                  | 1      | 0      | 3.631700                         | 4.533783  | 0.860386        |
| 55                                                  | 1      | 0      | 2.258929                         | 3.648966  | 1.594120        |
| 56                                                  | 1      | 0      | 3.941878                         | 3.038737  | 1.799216        |
| -----                                               |        |        |                                  |           |                 |
| Rotational constants (GHZ):                         |        |        | 0.3088845                        | 0.1136173 | 0.10589         |
| Leave Link                                          |        |        | 202 at Wed Dec 21 11:42:55 2022, | MaxMem=   | 6442450944 cpu: |
| (Enter /public1/home/sc81486/software/g09/1301.exe) |        |        |                                  |           |                 |

## Conformer 1c

| Center                                              | Atomic | Atomic | Coordinates (Angstroms)          |           |                 |
|-----------------------------------------------------|--------|--------|----------------------------------|-----------|-----------------|
| Number                                              | Number | Type   | X                                | Y         | Z               |
| -----                                               |        |        |                                  |           |                 |
| 1                                                   | 6      | 0      | 4.757243                         | -1.948216 | -0.813706       |
| 2                                                   | 6      | 0      | 5.512484                         | -0.773252 | -0.799529       |
| 3                                                   | 6      | 0      | 4.920006                         | 0.464106  | -0.518548       |
| 4                                                   | 6      | 0      | 3.557640                         | 0.460283  | -0.267384       |
| 5                                                   | 6      | 0      | 2.771706                         | -0.696583 | -0.293356       |
| 6                                                   | 6      | 0      | 3.379104                         | -1.918555 | -0.556159       |
| 7                                                   | 7      | 0      | 2.722036                         | 1.550640  | 0.052577        |
| 8                                                   | 6      | 0      | 1.401403                         | 1.212874  | 0.122320        |
| 9                                                   | 6      | 0      | 1.320385                         | -0.335449 | 0.035247        |
| 10                                                  | 6      | 0      | 0.930395                         | -1.001703 | 1.406885        |
| 11                                                  | 6      | 0      | 0.394332                         | -0.791462 | -1.126790       |
| 12                                                  | 6      | 0      | -0.308982                        | -0.453749 | 2.134932        |
| 13                                                  | 6      | 0      | -1.659856                        | -1.032646 | 1.612456        |
| 14                                                  | 6      | 0      | -2.702463                        | 0.026533  | 1.330796        |
| 15                                                  | 6      | 0      | -2.362562                        | 0.902144  | 0.164862        |
| 16                                                  | 7      | 0      | -2.139575                        | 0.081530  | -1.126035       |
| 17                                                  | 6      | 0      | -1.110077                        | -1.107859 | -0.926182       |
| 18                                                  | 6      | 0      | -1.431798                        | -1.909472 | 0.361685        |
| 19                                                  | 6      | 0      | -3.791327                        | 0.184229  | 2.101960        |
| 20                                                  | 6      | 0      | -4.895041                        | 1.193926  | 1.996115        |
| 21                                                  | 6      | 0      | -0.345256                        | -2.950517 | 0.673075        |
| 22                                                  | 8      | 0      | 0.855502                         | -2.413924 | 1.228378        |
| 23                                                  | 8      | 0      | 0.475806                         | 2.016373  | 0.217872        |
| 24                                                  | 6      | 0      | -3.436394                        | -0.581629 | -1.560081       |
| 25                                                  | 17     | 0      | -4.759236                        | 0.555225  | -1.921691       |
| 26                                                  | 6      | 0      | -1.668414                        | 1.025849  | -2.202004       |
| 27                                                  | 8      | 0      | 3.138017                         | 2.852372  | -0.131161       |
| 28                                                  | 6      | 0      | 3.243447                         | 3.550257  | 1.129301        |
| 29                                                  | 1      | 0      | 5.240974                         | -2.896541 | -1.025484       |
| 30                                                  | 1      | 0      | 6.577345                         | -0.815346 | -1.007398       |
| 31                                                  | 1      | 0      | 5.490880                         | 1.385748  | -0.508095       |
| 32                                                  | 1      | 0      | 2.804533                         | -2.839085 | -0.551240       |
| 33                                                  | 1      | 0      | 1.793104                         | -0.861731 | 2.063509        |
| 34                                                  | 1      | 0      | 0.547039                         | -0.144945 | -1.993594       |
| 35                                                  | 1      | 0      | 0.788621                         | -1.760871 | -1.446374       |
| 36                                                  | 1      | 0      | -0.302316                        | 0.638311  | 2.096737        |
| 37                                                  | 1      | 0      | -0.206823                        | -0.725753 | 3.189733        |
| 38                                                  | 1      | 0      | -2.059386                        | -1.707803 | 2.376642        |
| 39                                                  | 1      | 0      | -3.138088                        | 1.626647  | -0.077162       |
| 40                                                  | 1      | 0      | -1.416377                        | 1.429100  | 0.311311        |
| 41                                                  | 1      | 0      | -1.355111                        | -1.743674 | -1.783067       |
| 42                                                  | 1      | 0      | -2.347461                        | -2.485298 | 0.182036        |
| 43                                                  | 1      | 0      | -3.883567                        | -0.493084 | 2.952349        |
| 44                                                  | 1      | 0      | -4.826194                        | 1.842168  | 1.119214        |
| 45                                                  | 1      | 0      | -5.869267                        | 0.690431  | 1.970161        |
| 46                                                  | 1      | 0      | -4.902193                        | 1.834464  | 2.887463        |
| 47                                                  | 1      | 0      | -0.761441                        | -3.657920 | 1.401564        |
| 48                                                  | 1      | 0      | -0.083827                        | -3.529423 | -0.223758       |
| 49                                                  | 1      | 0      | -3.771782                        | -1.221927 | -0.749395       |
| 50                                                  | 1      | 0      | -3.234245                        | -1.153891 | -2.464425       |
| 51                                                  | 1      | 0      | -2.468545                        | 1.733966  | -2.412294       |
| 52                                                  | 1      | 0      | -0.796318                        | 1.560377  | -1.831354       |
| 53                                                  | 1      | 0      | -1.432735                        | 0.457366  | -3.103926       |
| 54                                                  | 1      | 0      | 3.631700                         | 4.533783  | 0.860386        |
| 55                                                  | 1      | 0      | 2.258929                         | 3.648966  | 1.594120        |
| 56                                                  | 1      | 0      | 3.941878                         | 3.038737  | 1.799216        |
| -----                                               |        |        |                                  |           |                 |
| Rotational constants (GHZ):                         |        |        | 0.3088845                        | 0.1136173 | 0.105895        |
| Leave Link                                          |        |        | 202 at Wed Dec 21 11:42:55 2022, | MaxMem=   | 6442450944 cpu: |
| (Enter /public1/home/sc81486/software/g09/l301.exe) |        |        |                                  |           |                 |

**Table S7** Standard orientations of configuration **2** for ECD calculation.**Conformer 2a**

| Center                                                              | Atomic | Atomic | Coordinates (Angstroms) |           |           |
|---------------------------------------------------------------------|--------|--------|-------------------------|-----------|-----------|
| Number                                                              | Number | Type   | X                       | Y         | Z         |
| 1                                                                   | 6      | 0      | -5.376860               | -0.347451 | -0.852848 |
| 2                                                                   | 6      | 0      | -5.730619               | -0.443549 | 0.509582  |
| 3                                                                   | 6      | 0      | -4.766759               | -0.570354 | 1.502084  |
| 4                                                                   | 6      | 0      | -3.429636               | -0.598675 | 1.094244  |
| 5                                                                   | 6      | 0      | -3.050250               | -0.504528 | -0.272003 |
| 6                                                                   | 6      | 0      | -4.048912               | -0.377792 | -1.253913 |
| 7                                                                   | 7      | 0      | -2.269550               | -0.719655 | 1.847032  |
| 8                                                                   | 6      | 0      | -1.186266               | -0.706620 | 0.990867  |
| 9                                                                   | 6      | 0      | -1.611935               | -0.568514 | -0.306997 |
| 10                                                                  | 6      | 0      | 0.238806                | -0.714619 | 1.449472  |
| 11                                                                  | 7      | 0      | 1.108640                | -1.196160 | 0.258876  |
| 12                                                                  | 6      | 0      | 0.786213                | -0.289859 | -0.973806 |
| 13                                                                  | 6      | 0      | -0.646834               | -0.564926 | -1.452984 |
| 14                                                                  | 6      | 0      | 0.738243                | 0.692568  | 1.887376  |
| 15                                                                  | 6      | 0      | 2.952050                | 0.328237  | 0.971482  |
| 16                                                                  | 6      | 0      | 2.595295                | -1.094688 | 0.613697  |
| 17                                                                  | 6      | 0      | 4.156360                | 0.700494  | 1.411236  |
| 18                                                                  | 6      | 0      | 1.754330                | 1.233544  | 0.856358  |
| 19                                                                  | 6      | 0      | 5.357783                | -0.179058 | 1.596778  |
| 20                                                                  | 6      | 0      | 1.175022                | 1.199442  | -0.595255 |
| 21                                                                  | 6      | 0      | 2.223268                | 1.693601  | -1.643847 |
| 22                                                                  | 8      | 0      | 3.224223                | 0.704620  | -1.833227 |
| 23                                                                  | 6      | 0      | 0.781049                | -2.655299 | 0.011477  |
| 24                                                                  | 17     | 0      | 1.630163                | -3.355316 | -1.388379 |
| 25                                                                  | 6      | 0      | 0.003244                | 2.199323  | -0.791833 |
| 26                                                                  | 8      | 0      | -0.574663               | 2.334756  | -1.849577 |
| 27                                                                  | 8      | 0      | -0.232314               | 2.967518  | 0.279664  |
| 28                                                                  | 6      | 0      | -1.260467               | 3.976621  | 0.111518  |
| 29                                                                  | 1      | 0      | -6.160558               | -0.249008 | -1.597690 |
| 30                                                                  | 1      | 0      | -6.779438               | -0.418189 | 0.789379  |
| 31                                                                  | 1      | 0      | -5.043744               | -0.645309 | 2.549764  |
| 32                                                                  | 1      | 0      | -3.786993               | -0.301990 | -2.305462 |
| 33                                                                  | 1      | 0      | -2.236852               | -0.806424 | 2.851955  |
| 34                                                                  | 1      | 0      | 0.405156                | -1.450913 | 2.244454  |
| 35                                                                  | 1      | 0      | 1.496647                | -0.628040 | -1.726147 |
| 36                                                                  | 1      | 0      | -0.897014               | 0.200449  | -2.191256 |
| 37                                                                  | 1      | 0      | -0.661098               | -1.520171 | -1.995563 |
| 38                                                                  | 1      | 0      | 1.234044                | 0.629316  | 2.860050  |
| 39                                                                  | 1      | 0      | -0.120428               | 1.356239  | 1.986382  |
| 40                                                                  | 1      | 0      | 2.756521                | -1.799493 | 1.436569  |
| 41                                                                  | 1      | 0      | 3.140356                | -1.447561 | -0.263299 |
| 42                                                                  | 1      | 0      | 4.298867                | 1.754412  | 1.649427  |
| 43                                                                  | 1      | 0      | 2.018193                | 2.261573  | 1.111459  |
| 44                                                                  | 1      | 0      | 5.159447                | -1.233433 | 1.380090  |
| 45                                                                  | 1      | 0      | 6.175187                | 0.145692  | 0.940197  |
| 46                                                                  | 1      | 0      | 5.736944                | -0.110773 | 2.624056  |
| 47                                                                  | 1      | 0      | 2.656311                | 2.637222  | -1.279677 |
| 48                                                                  | 1      | 0      | 1.693424                | 1.896794  | -2.581668 |
| 49                                                                  | 1      | 0      | 3.779306                | 0.972376  | -2.581823 |
| 50                                                                  | 1      | 0      | 1.087680                | -3.203023 | 0.902163  |
| 51                                                                  | 1      | 0      | -0.289303               | -2.747893 | -0.142298 |
| 52                                                                  | 1      | 0      | -1.292912               | 4.511260  | 1.059694  |
| 53                                                                  | 1      | 0      | -2.217996               | 3.498159  | -0.103036 |
| 54                                                                  | 1      | 0      | -0.994881               | 4.647264  | -0.707610 |
| -----                                                               |        |        |                         |           |           |
| Rotational constants (GHz):                                         |        |        | 0.2720507               | 0.1368033 | 0.117488  |
| Leave Link 202 at Wed Dec 21 16:54:30 2022, MaxMem= 6442450944 cpu: |        |        |                         |           |           |
| (Enter /pub/1/home/sc81486/software/g09/1301 ave)                   |        |        |                         |           |           |

## Conformer 2b

| Center                                              | Atomic | Atomic | Coordinates (Angstroms) |           |           |
|-----------------------------------------------------|--------|--------|-------------------------|-----------|-----------|
| Number                                              | Number | Type   | X                       | Y         | Z         |
| -----                                               |        |        |                         |           |           |
| 1                                                   | 6      | 0      | 5.391851                | 0.033806  | 0.847218  |
| 2                                                   | 6      | 0      | 5.687921                | -0.516924 | -0.417503 |
| 3                                                   | 6      | 0      | 4.683333                | -0.961275 | -1.268142 |
| 4                                                   | 6      | 0      | 3.364913                | -0.840793 | -0.818145 |
| 5                                                   | 6      | 0      | 3.043908                | -0.291999 | 0.452711  |
| 6                                                   | 6      | 0      | 4.082460                | 0.149703  | 1.291468  |
| 7                                                   | 7      | 0      | 2.174316                | -1.194507 | -1.437666 |
| 8                                                   | 6      | 0      | 1.128176                | -0.892908 | -0.590084 |
| 9                                                   | 6      | 0      | 1.609059                | -0.331570 | 0.567902  |
| 10                                                  | 6      | 0      | -0.313603               | -1.049093 | -0.962002 |
| 11                                                  | 7      | 0      | -1.119306               | -1.126179 | 0.353293  |
| 12                                                  | 6      | 0      | -0.760859               | 0.140103  | 1.216646  |
| 13                                                  | 6      | 0      | 0.698639                | 0.060698  | 1.690773  |
| 14                                                  | 6      | 0      | -0.859325               | 0.142757  | -1.800989 |
| 15                                                  | 6      | 0      | -3.024817               | 0.086226  | -0.708716 |
| 16                                                  | 6      | 0      | -2.627679               | -1.135705 | 0.082735  |
| 17                                                  | 6      | 0      | -4.252320               | 0.284744  | -1.195449 |
| 18                                                  | 6      | 0      | -1.841683               | 0.983897  | -0.953872 |
| 19                                                  | 6      | 0      | -5.441680               | -0.615690 | -1.032360 |
| 20                                                  | 6      | 0      | -1.199301               | 1.426391  | 0.399553  |
| 21                                                  | 6      | 0      | -2.210754               | 2.225215  | 1.283575  |
| 22                                                  | 8      | 0      | -3.164905               | 1.339822  | 1.853025  |
| 23                                                  | 6      | 0      | -0.767241               | -2.359902 | 1.157802  |
| 24                                                  | 17     | 0      | -1.174145               | -3.891227 | 0.335608  |
| 25                                                  | 6      | 0      | -0.043231               | 2.446168  | 0.201830  |
| 26                                                  | 8      | 0      | 0.576301                | 2.926274  | 1.127818  |
| 27                                                  | 8      | 0      | 0.126337                | 2.822348  | -1.071273 |
| 28                                                  | 6      | 0      | 1.135570                | 3.840116  | -1.294640 |
| 29                                                  | 1      | 0      | 6.205806                | 0.371096  | 1.481600  |
| 30                                                  | 1      | 0      | 6.723671                | -0.595142 | -0.733753 |
| 31                                                  | 1      | 0      | 4.915712                | -1.385055 | -2.240924 |
| 32                                                  | 1      | 0      | 3.865621                | 0.576375  | 2.266783  |
| 33                                                  | 1      | 0      | 2.099900                | -1.641689 | -2.339441 |
| 34                                                  | 1      | 0      | -0.496416               | -1.999685 | -1.470356 |
| 35                                                  | 1      | 0      | -1.434575               | 0.056380  | 2.070011  |
| 36                                                  | 1      | 0      | 0.957868                | 1.038712  | 2.102919  |
| 37                                                  | 1      | 0      | 0.770154                | -0.641346 | 2.533670  |
| 38                                                  | 1      | 0      | -1.395689               | -0.232313 | -2.677025 |
| 39                                                  | 1      | 0      | -0.020548               | 0.744424  | -2.150064 |
| 40                                                  | 1      | 0      | -2.843198               | -2.069949 | -0.438088 |
| 41                                                  | 1      | 0      | -3.103071               | -1.161392 | 1.067501  |
| 42                                                  | 1      | 0      | -4.424721               | 1.200359  | -1.760980 |
| 43                                                  | 1      | 0      | -2.136875               | 1.872326  | -1.515294 |
| 44                                                  | 1      | 0      | -5.212373               | -1.542964 | -0.497840 |
| 45                                                  | 1      | 0      | -6.239258               | -0.102997 | -0.479261 |
| 46                                                  | 1      | 0      | -5.862984               | -0.884525 | -2.008984 |
| 47                                                  | 1      | 0      | -2.695545               | 2.982344  | 0.649883  |
| 48                                                  | 1      | 0      | -1.644594               | 2.741623  | 2.067454  |
| 49                                                  | 1      | 0      | -3.745251               | 1.852992  | 2.436265  |
| 50                                                  | 1      | 0      | 0.302929                | -2.365168 | 1.330081  |
| 51                                                  | 1      | 0      | -1.328322               | -2.310994 | 2.090314  |
| 52                                                  | 1      | 0      | 1.112851                | 4.033288  | -2.366087 |
| 53                                                  | 1      | 0      | 2.113125                | 3.467345  | -0.982908 |
| 54                                                  | 1      | 0      | 0.889300                | 4.740282  | -0.728622 |
| -----                                               |        |        |                         |           |           |
| Rotational constants (GHz):                         |        |        | 0.2610652               | 0.1437528 | 0.1128925 |
| Leave Link 202 at Wed Dec 21 17:08:33 2022, MaxMem= |        |        | 6442450944 cpu:         |           |           |
| (Enter /public1/home/sc81486/software/g09/1301.exe) |        |        |                         |           |           |

## Conformer 2c

| Center                                                              | Atomic | Atomic | Coordinates (Angstroms) |           |           |
|---------------------------------------------------------------------|--------|--------|-------------------------|-----------|-----------|
| Number                                                              | Number | Type   | X                       | Y         | Z         |
| -----                                                               |        |        |                         |           |           |
| 1                                                                   | 6      | 0      | 5.357830                | -0.214450 | 0.719047  |
| 2                                                                   | 6      | 0      | 5.677737                | -0.596584 | -0.600764 |
| 3                                                                   | 6      | 0      | 4.689418                | -0.926309 | -1.519811 |
| 4                                                                   | 6      | 0      | 3.362775                | -0.861113 | -1.083455 |
| 5                                                                   | 6      | 0      | 3.016753                | -0.476083 | 0.239986  |
| 6                                                                   | 6      | 0      | 4.039895                | -0.152802 | 1.149368  |
| 7                                                                   | 7      | 0      | 2.185155                | -1.137517 | -1.763671 |
| 8                                                                   | 6      | 0      | 1.122087                | -0.926916 | -0.909805 |
| 9                                                                   | 6      | 0      | 1.579863                | -0.519097 | 0.318845  |
| 10                                                                  | 6      | 0      | -0.313225               | -1.030718 | -1.327115 |
| 11                                                                  | 7      | 0      | -1.161013               | -1.203811 | -0.038624 |
| 12                                                                  | 6      | 0      | -0.793334               | -0.040428 | 0.939821  |
| 13                                                                  | 6      | 0      | 0.639557                | -0.243001 | 1.452017  |
| 14                                                                  | 6      | 0      | -0.819926               | 0.230730  | -2.081113 |
| 15                                                                  | 6      | 0      | -3.003575               | 0.159605  | -1.028990 |
| 16                                                                  | 6      | 0      | -2.655091               | -1.155387 | -0.373496 |
| 17                                                                  | 6      | 0      | -4.218858               | 0.452748  | -1.497590 |
| 18                                                                  | 6      | 0      | -1.784575               | 1.029671  | -1.173688 |
| 19                                                                  | 6      | 0      | -5.440275               | -0.416904 | -1.437566 |
| 20                                                                  | 6      | 0      | -1.141446               | 1.327250  | 0.221187  |
| 21                                                                  | 6      | 0      | -2.123293               | 2.116353  | 1.142318  |
| 22                                                                  | 8      | 0      | -3.146710               | 1.247215  | 1.604660  |
| 23                                                                  | 6      | 0      | -0.851084               | -2.572651 | 0.534583  |
| 24                                                                  | 17     | 0      | -1.671273               | -2.908076 | 2.079632  |
| 25                                                                  | 6      | 0      | 0.060703                | 2.286963  | -0.009752 |
| 26                                                                  | 8      | 0      | 0.399966                | 2.701904  | -1.095631 |
| 27                                                                  | 8      | 0      | 0.624370                | 2.690017  | 1.141237  |
| 28                                                                  | 6      | 0      | 1.728609                | 3.621550  | 1.009829  |
| 29                                                                  | 1      | 0      | 6.159964                | 0.031619  | 1.408137  |
| 30                                                                  | 1      | 0      | 6.719222                | -0.635372 | -0.905065 |
| 31                                                                  | 1      | 0      | 4.940243                | -1.221979 | -2.534417 |
| 32                                                                  | 1      | 0      | 3.805397                | 0.136091  | 2.170385  |
| 33                                                                  | 1      | 0      | 2.126336                | -1.397727 | -2.737120 |
| 34                                                                  | 1      | 0      | -0.496296               | -1.936933 | -1.916072 |
| 35                                                                  | 1      | 0      | -1.500202               | -0.165540 | 1.758601  |
| 36                                                                  | 1      | 0      | 0.920487                | 0.656695  | 2.003573  |
| 37                                                                  | 1      | 0      | 0.642287                | -1.054296 | 2.192809  |
| 38                                                                  | 1      | 0      | -1.361123               | -0.064138 | -2.984427 |
| 39                                                                  | 1      | 0      | 0.033649                | 0.840700  | -2.374426 |
| 40                                                                  | 1      | 0      | -2.846277               | -2.021664 | -1.016467 |
| 41                                                                  | 1      | 0      | -3.179873               | -1.298668 | 0.572490  |
| 42                                                                  | 1      | 0      | -4.352808               | 1.427732  | -1.965639 |
| 43                                                                  | 1      | 0      | -2.029019               | 1.977444  | -1.657434 |
| 44                                                                  | 1      | 0      | -5.250793               | -1.398532 | -0.991881 |
| 45                                                                  | 1      | 0      | -6.228885               | 0.068022  | -0.847955 |
| 46                                                                  | 1      | 0      | -5.854733               | -0.576468 | -2.440852 |
| 47                                                                  | 1      | 0      | -2.538276               | 2.952748  | 0.560742  |
| 48                                                                  | 1      | 0      | -1.559991               | 2.532592  | 1.984918  |
| 49                                                                  | 1      | 0      | -3.712697               | 1.740127  | 2.218528  |
| 50                                                                  | 1      | 0      | -1.193067               | -3.305286 | -0.195796 |
| 51                                                                  | 1      | 0      | 0.221511                | -2.652817 | 0.679908  |
| 52                                                                  | 1      | 0      | 2.011256                | 3.873967  | 2.030810  |
| 53                                                                  | 1      | 0      | 1.406385                | 4.508376  | 0.461612  |
| 54                                                                  | 1      | 0      | 2.555654                | 3.142235  | 0.482099  |
| -----                                                               |        |        |                         |           |           |
| Rotational constants (GHZ):                                         |        |        | 0.2774849               | 0.1351331 | 0.1191052 |
| Leave Link 202 at Wed Dec 21 17:10:43 2022, MaxMem= 6442450944 cpu: |        |        |                         |           |           |
| (Enter /public1/home/sc81486/software/g09/l301.exe)                 |        |        |                         |           |           |
| Standard basis: 6-311G(2d,p) (5D, 7F)                               |        |        |                         |           |           |

## Conformer 2d

| Center                                                              | Atomic | Atomic | Coordinates (Angstroms) |           |           |
|---------------------------------------------------------------------|--------|--------|-------------------------|-----------|-----------|
| Number                                                              | Number | Type   | X                       | Y         | Z         |
| -----                                                               |        |        |                         |           |           |
| 1                                                                   | 6      | 0      | -5.386629               | 0.009585  | -0.662190 |
| 2                                                                   | 6      | 0      | -5.645613               | -0.712400 | 0.521818  |
| 3                                                                   | 6      | 0      | -4.615063               | -1.247749 | 1.284267  |
| 4                                                                   | 6      | 0      | -3.308939               | -1.039669 | 0.830983  |
| 5                                                                   | 6      | 0      | -3.024247               | -0.313982 | -0.357172 |
| 6                                                                   | 6      | 0      | -4.088921               | 0.212671  | -1.110093 |
| 7                                                                   | 7      | 0      | -2.100259               | -1.456119 | 1.370111  |
| 8                                                                   | 6      | 0      | -1.076738               | -1.011428 | 0.560833  |
| 9                                                                   | 6      | 0      | -1.591625               | -0.305080 | -0.499033 |
| 10                                                                  | 6      | 0      | 0.375013                | -1.191832 | 0.881467  |
| 11                                                                  | 7      | 0      | 1.157548                | -1.052697 | -0.444740 |
| 12                                                                  | 6      | 0      | 0.755805                | 0.319725  | -1.101506 |
| 13                                                                  | 6      | 0      | -0.709390               | 0.271268  | -1.562887 |
| 14                                                                  | 6      | 0      | 0.914699                | -0.128627 | 1.880240  |
| 15                                                                  | 6      | 0      | 3.060588                | 0.036652  | 0.751074  |
| 16                                                                  | 6      | 0      | 2.671744                | -1.067227 | -0.202264 |
| 17                                                                  | 6      | 0      | 4.294071                | 0.194426  | 1.237813  |
| 18                                                                  | 6      | 0      | 1.862154                | 0.852228  | 1.150792  |
| 19                                                                  | 6      | 0      | 5.501582                | -0.639368 | 0.924187  |
| 20                                                                  | 6      | 0      | 1.177670                | 1.478355  | -0.107804 |
| 21                                                                  | 6      | 0      | 2.151992                | 2.432845  | -0.867604 |
| 22                                                                  | 8      | 0      | 3.094871                | 1.667294  | -1.607104 |
| 23                                                                  | 6      | 0      | 0.815888                | -2.159681 | -1.420232 |
| 24                                                                  | 17     | 0      | 1.271973                | -3.787189 | -0.846732 |
| 25                                                                  | 6      | 0      | 0.017515                | 2.386897  | 0.392757  |
| 26                                                                  | 8      | 0      | -0.271904               | 2.537346  | 1.558364  |
| 27                                                                  | 8      | 0      | -0.566268               | 3.072485  | -0.605181 |
| 28                                                                  | 6      | 0      | -1.619566               | 3.988152  | -0.207875 |
| 29                                                                  | 1      | 0      | -6.220107               | 0.409638  | -1.231502 |
| 30                                                                  | 1      | 0      | -6.672705               | -0.854062 | 0.843973  |
| 31                                                                  | 1      | 0      | -4.818765               | -1.804852 | 2.194130  |
| 32                                                                  | 1      | 0      | -3.902290               | 0.765619  | -2.026909 |
| 33                                                                  | 1      | 0      | -1.997468               | -1.988678 | 2.221387  |
| 34                                                                  | 1      | 0      | 0.583528                | -2.204946 | 1.235750  |
| 35                                                                  | 1      | 0      | 1.415122                | 0.382960  | -1.967641 |
| 36                                                                  | 1      | 0      | -0.998698               | 1.291016  | -1.826031 |
| 37                                                                  | 1      | 0      | -0.776462               | -0.298662 | -2.500593 |
| 38                                                                  | 1      | 0      | 1.477190                | -0.618810 | 2.679695  |
| 39                                                                  | 1      | 0      | 0.076571                | 0.404590  | 2.326837  |
| 40                                                                  | 1      | 0      | 2.914079                | -2.061974 | 0.175036  |
| 41                                                                  | 1      | 0      | 3.128022                | -0.941605 | -1.188440 |
| 42                                                                  | 1      | 0      | 4.455901                | 1.020703  | 1.929823  |
| 43                                                                  | 1      | 0      | 2.140228                | 1.656068  | 1.835271  |
| 44                                                                  | 1      | 0      | 5.282777                | -1.491123 | 0.272549  |
| 45                                                                  | 1      | 0      | 6.271050                | -0.032582 | 0.429391  |
| 46                                                                  | 1      | 0      | 5.955319                | -1.027221 | 1.844571  |
| 47                                                                  | 1      | 0      | 2.650214                | 3.071599  | -0.124067 |
| 48                                                                  | 1      | 0      | 1.571427                | 3.075797  | -1.538036 |
| 49                                                                  | 1      | 0      | 3.705698                | 2.278303  | -2.047210 |
| 50                                                                  | 1      | 0      | -0.257361               | -2.165475 | -1.573205 |
| 51                                                                  | 1      | 0      | 1.356680                | -1.957658 | -2.344145 |
| 52                                                                  | 1      | 0      | -1.932016               | 4.479104  | -1.128331 |
| 53                                                                  | 1      | 0      | -1.232277               | 4.712422  | 0.510710  |
| 54                                                                  | 1      | 0      | -2.445742               | 3.432192  | 0.239780  |
| -----                                                               |        |        |                         |           |           |
| Rotational constants (GHZ):                                         |        |        | 0.2620693               | 0.1443811 | 0.111844  |
| Leave Link 202 at Wed Dec 21 17:07:39 2022, MaxMem= 6442450944 cpu: |        |        |                         |           |           |
| (Enter /public1/home/sc81486/software/g09/1301.exe)                 |        |        |                         |           |           |

### 2.3. Experimental and calculated ECD spectra of 1 and 2

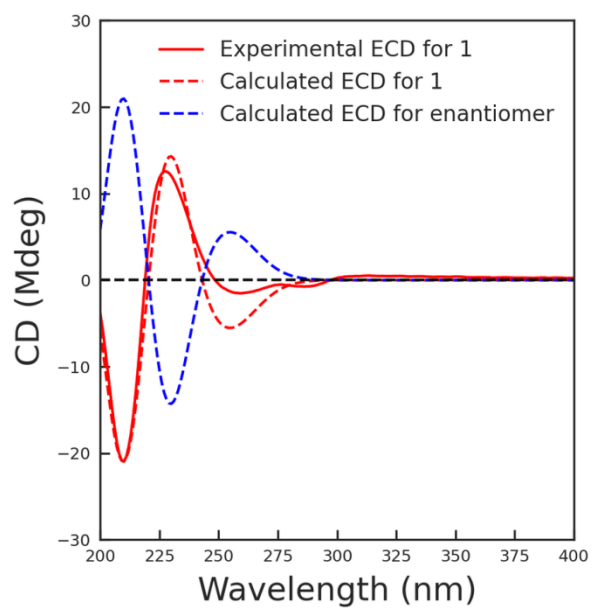

**Figure S4.** Calculated ECDs and experimental of **1**.

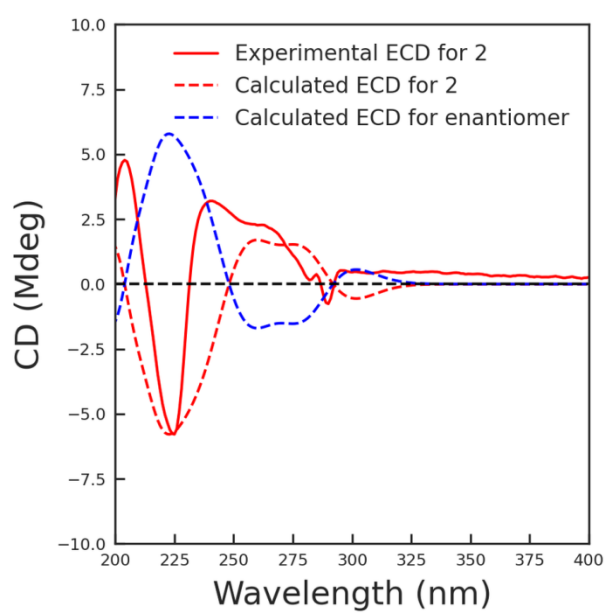

**Figure S5.** Calculated ECDs and experimental of **2**.

### 3. Supplementary figures

**Figure S6. <sup>1</sup> H NMR spectrum of 1 (CD<sub>3</sub>OD, 400 MHz)**

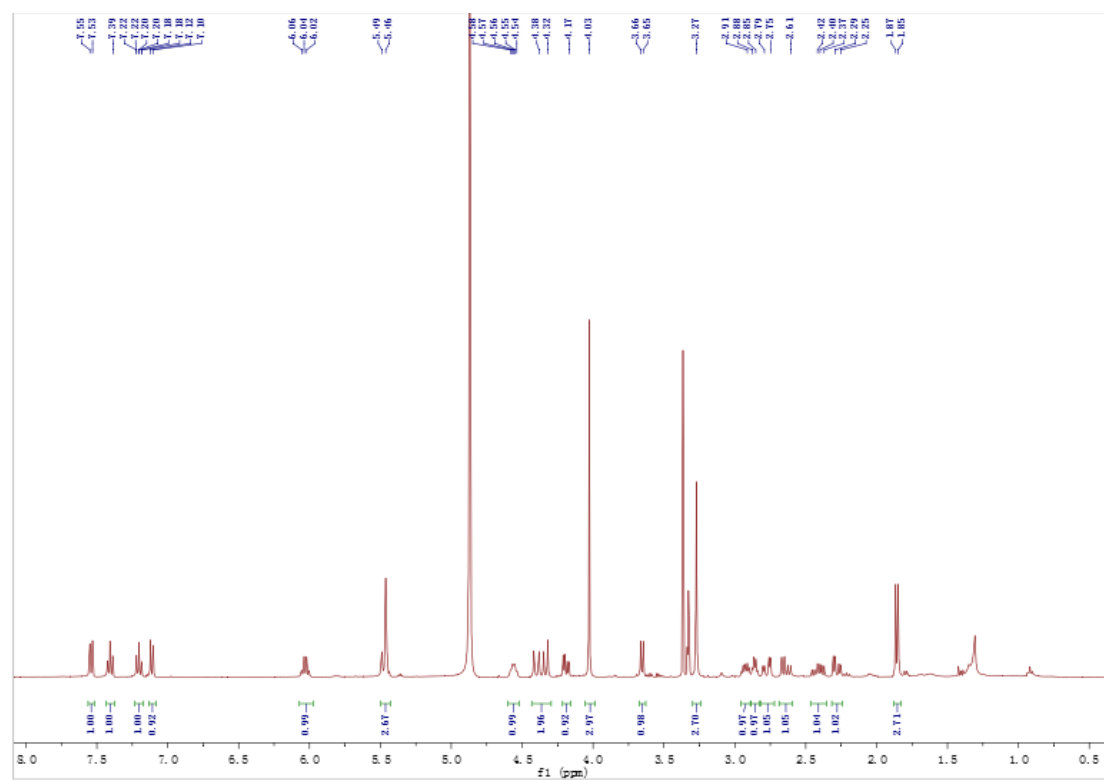



Figure S7.  $^{13}\text{C}$  NMR spectrum of 1 ( $\text{CD}_3\text{OD}$ , 100 MHz)

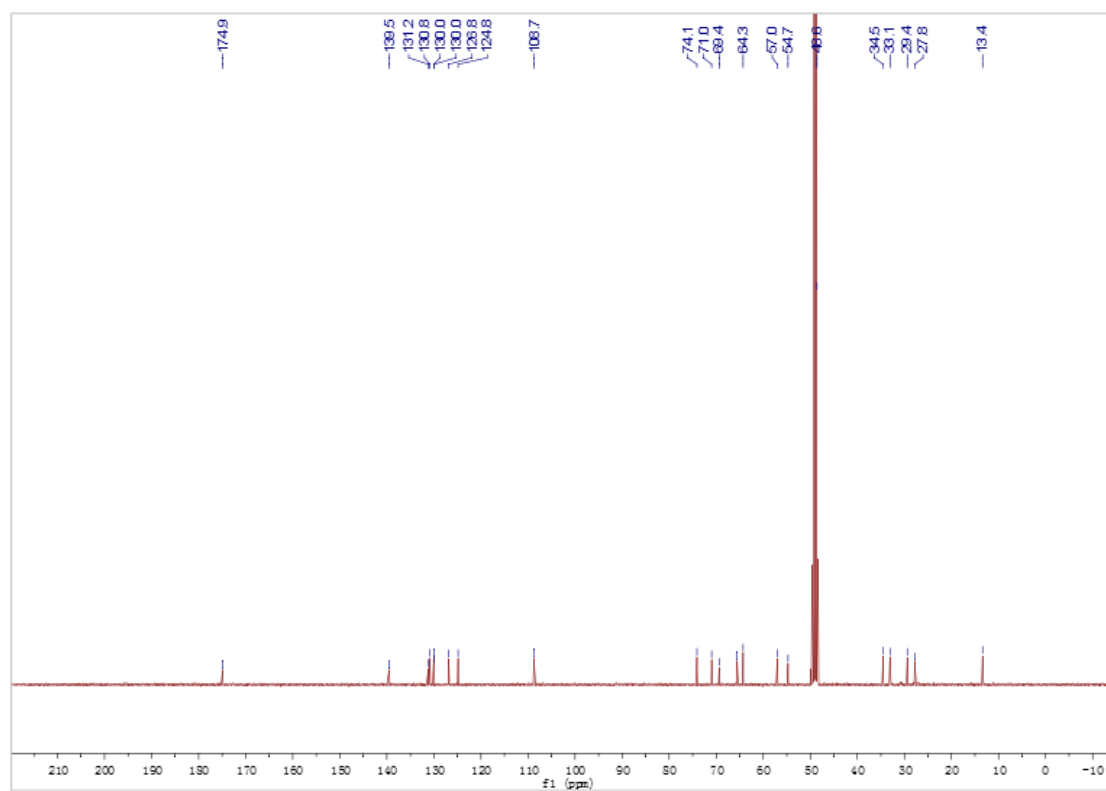

Figure S8. HSQC spectrum of 1 (CD<sub>3</sub>OD, 400 MHz).

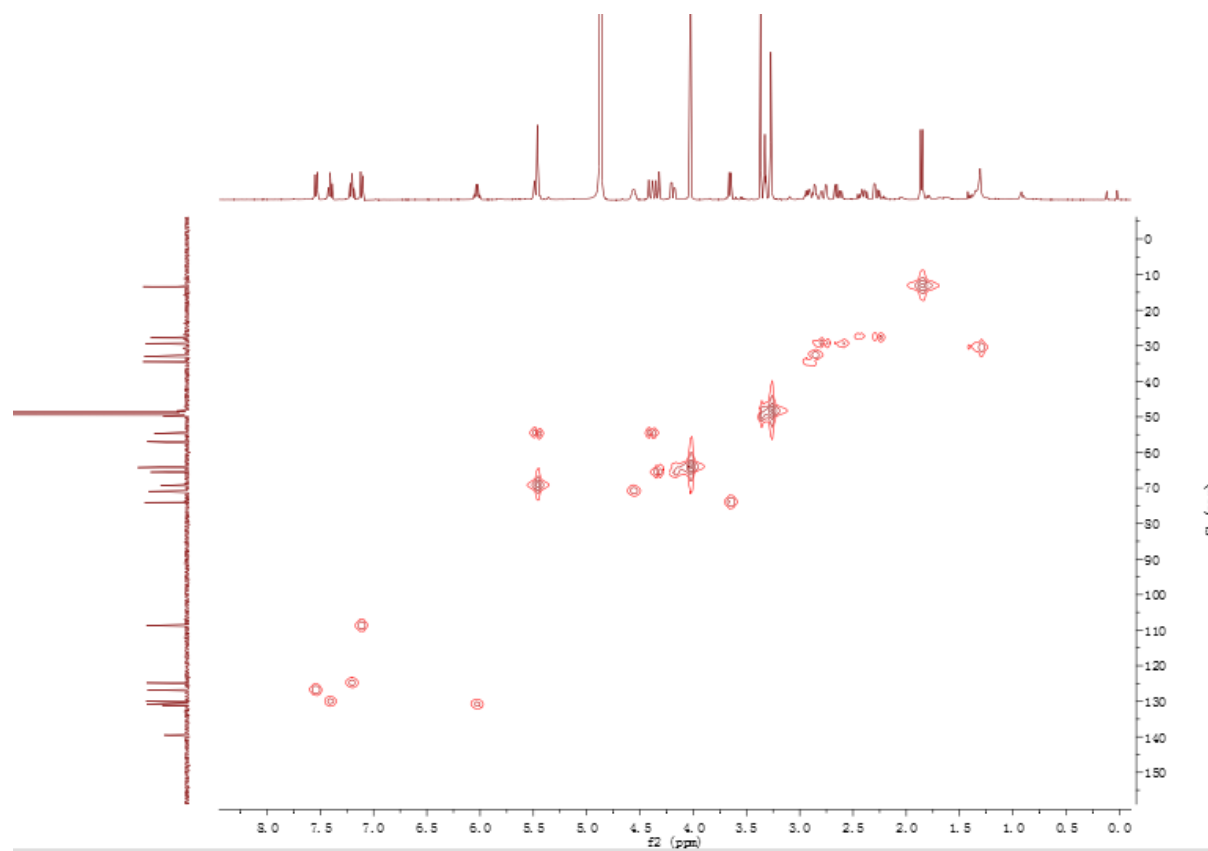

Figure S9. HMBC spectrum of 1 (CD<sub>3</sub>OD, 400 MHz).

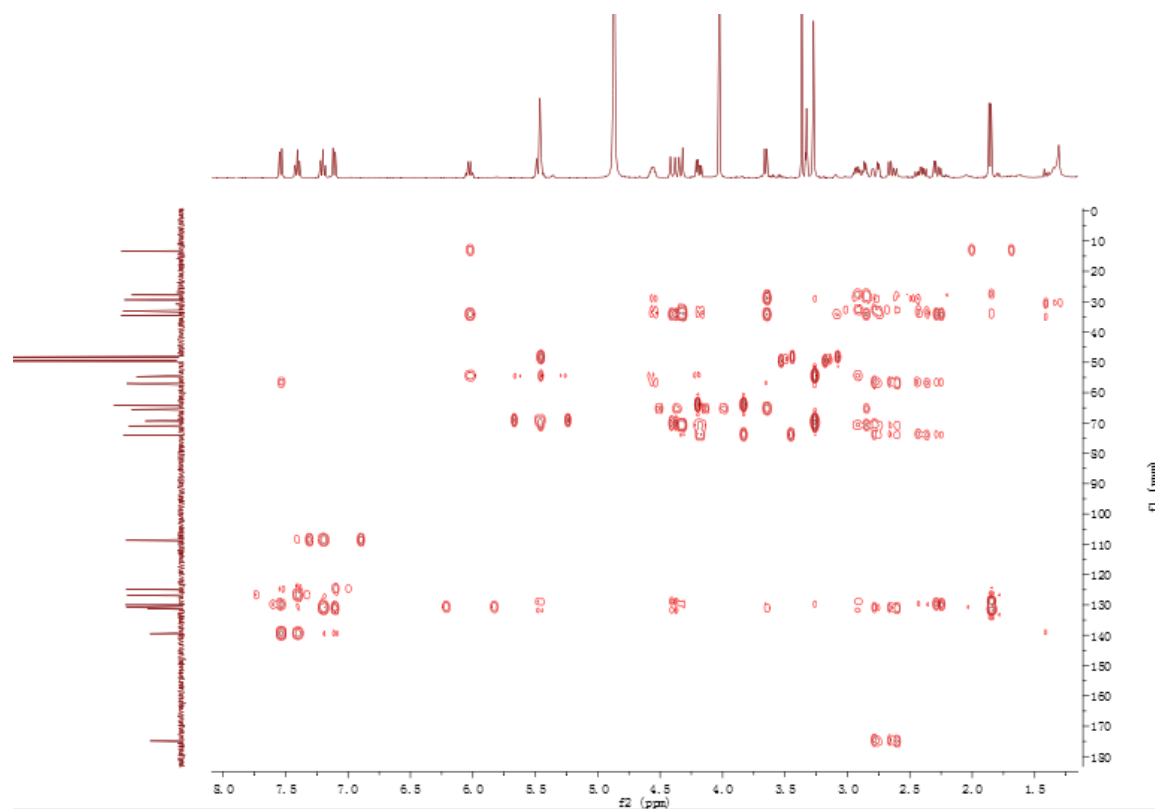

**Figure S10. ROESY spectrum of 1 (CD<sub>3</sub>OD, 400 MHz).**

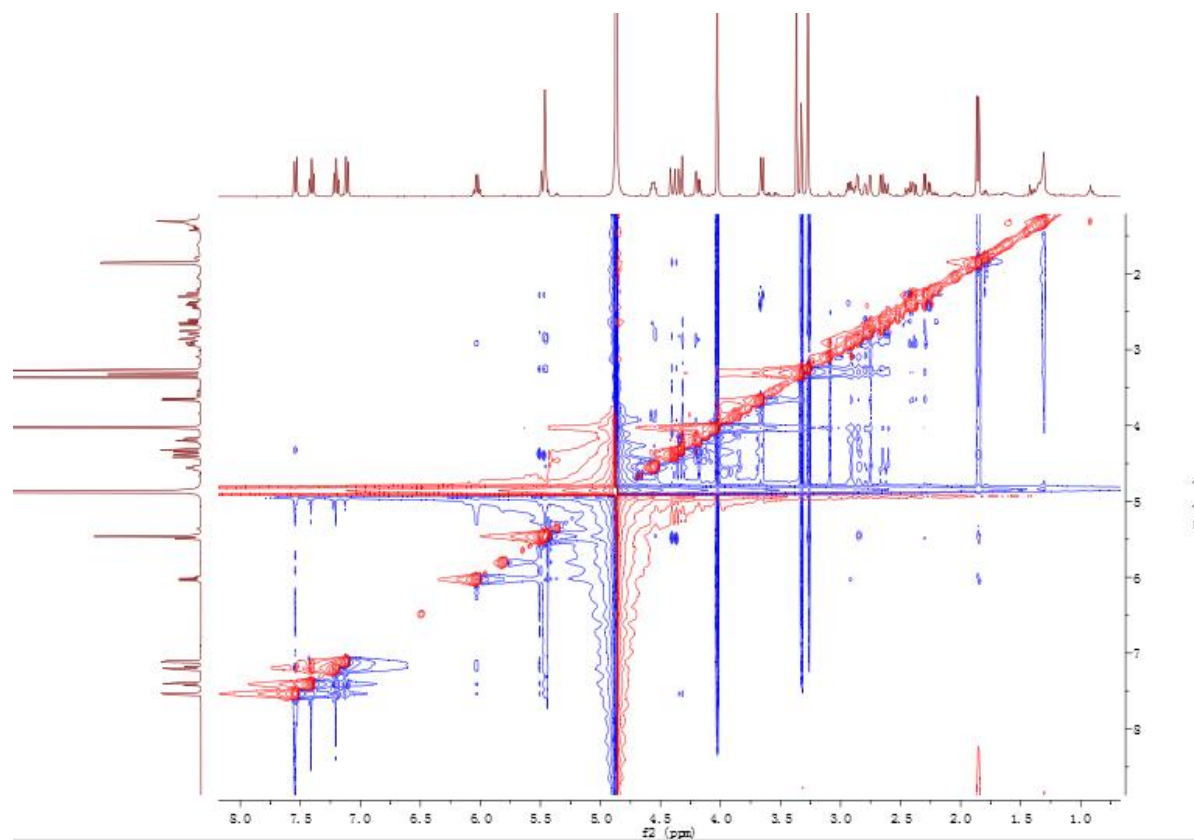

**Figure S11.**  $^1\text{H}$ - $^1\text{H}$  COSY spectrum of **1** ( $\text{CD}_3\text{OD}$ , 400 MHz).

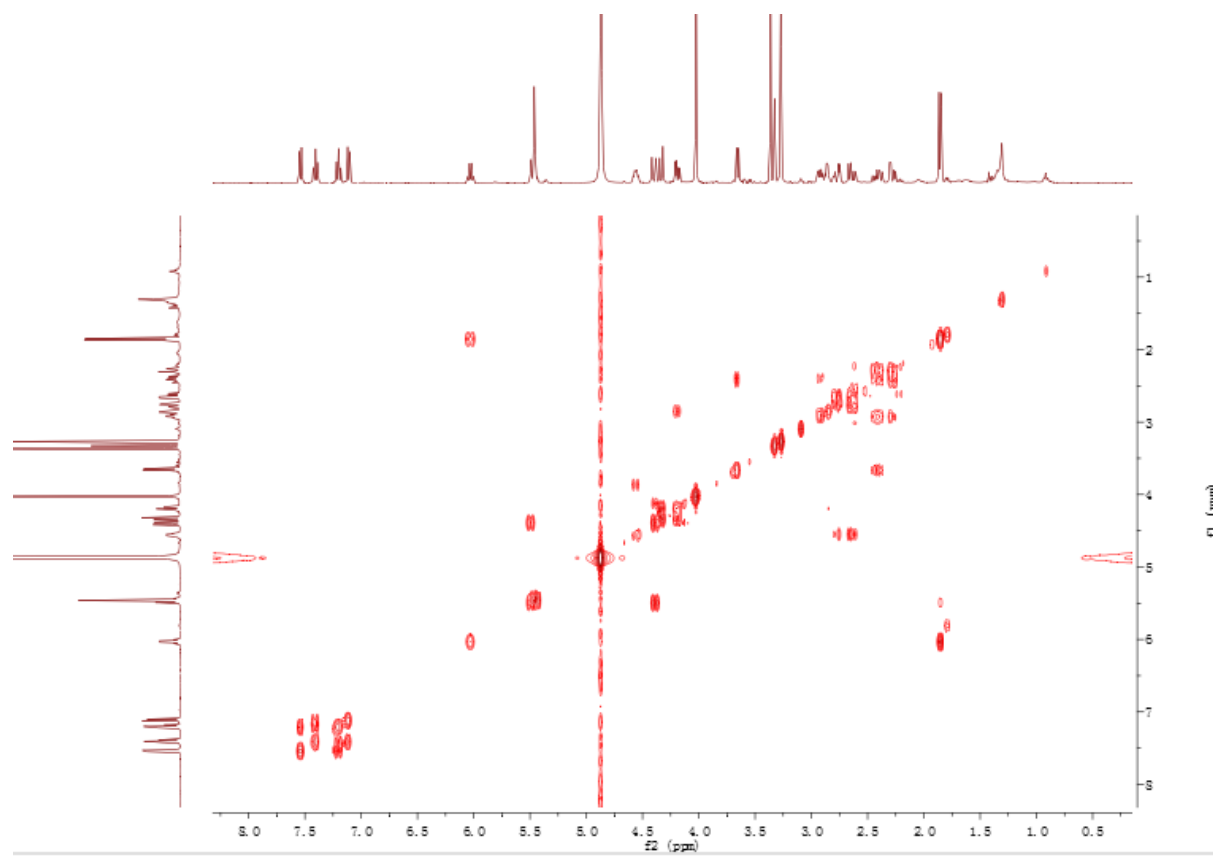

**Figure S12. HR-ESI-MS spectrum of 1**

Formula Predictor Report - GL-71.lcd

Page 1 of 1

Data File: E:\DATA\2022\1125\GL-71.lcd

| Elmt | Val. | Min | Max | Use Adduct |
|------|------|-----|-----|------|------|-----|-----|------|------|-----|-----|------|------|-----|-----|------------|
| H    | 1    | 5   | 100 | F    | 1    | 0   | 0   | Cl   | 1    | 0   | 5   | Ag   | 1    | 0   | 0   | None       |
| 2H   | 1    | 0   | 0   | Na   | 1    | 0   | 0   | Co   | 2    | 0   | 0   | I    | 3    | 0   | 0   |            |
| B    | 3    | 0   | 0   | Mg   | 2    | 0   | 0   | Cu   | 2    | 0   | 0   | Ir   | 3    | 0   | 0   |            |
| C    | 4    | 5   | 60  | Si   | 4    | 0   | 0   | Se   | 2    | 0   | 0   |      |      |     |     |            |
| N    | 3    | 0   | 5   | P    | 3    | 0   | 0   | Br   | 1    | 0   | 0   |      |      |     |     |            |
| O    | 2    | 0   | 30  | S    | 2    | 0   | 0   | Pd   | 2    | 0   | 0   |      |      |     |     |            |

Error Margin (ppm): 5  
 HC Ratio: unlimited  
 Max Isotopes: all  
 MSn Iso RI (%): 75.00

DBE Range: not fixed  
 Apply N Rule: no  
 Isotope RI (%): 1.00  
 MSn Logic Mode: OR

Electron Ions: both  
 Use MSn Info: yes  
 Isotope Res: 10000  
 Max Results: 30

Event#: 1 MS(E+) Ret. Time : 0.453 -> 0.813 Scan#: 69 -> 123

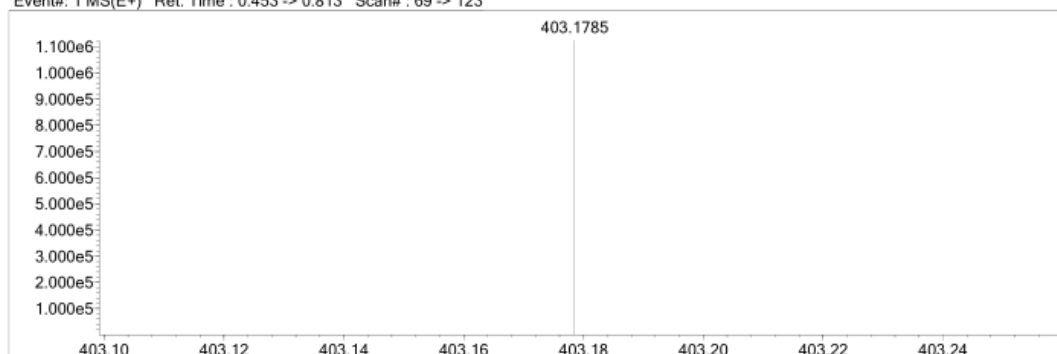

Measured region for 403.1785 m/z

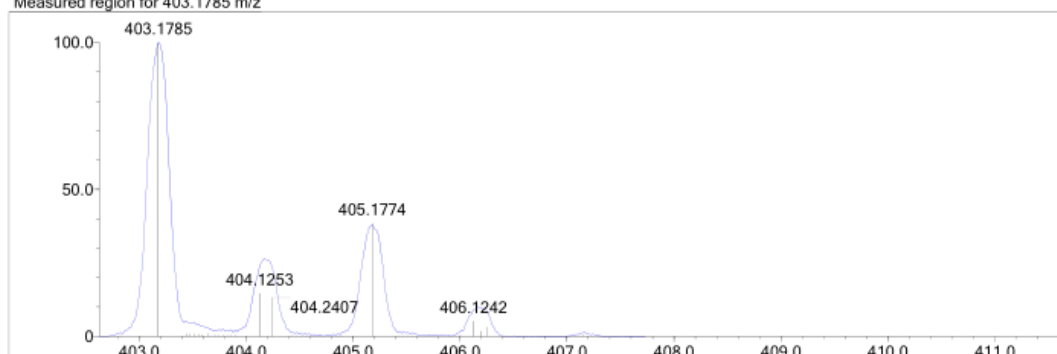

C22 H28 N2 O3 Cl M+ : Predicted region for 403.1783 m/z

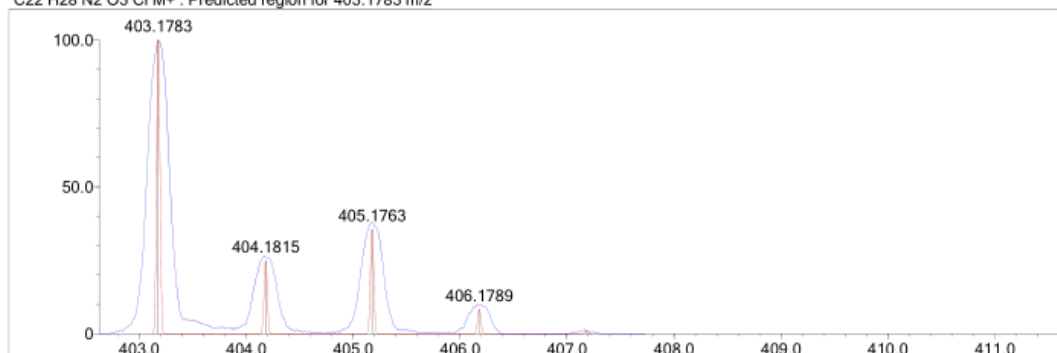

| Formula (M)      | Ion | Meas. m/z | Pred. m/z | Df. (mDa) | Df. (ppm) | DBE |
|------------------|-----|-----------|-----------|-----------|-----------|-----|
| C22 H28 N2 O3 Cl | M+  | 403.1785  | 403.1783  | 0.2       | 0.50      | 9.5 |

**Figure S13. ORD spectrum of 1**

**Rudolph Research Analytical**

This sample was measured on an Autopol VI, Serial #91058  
Manufactured by Rudolph Research Analytical, Hackettstown, NJ, USA.

Measurement Date : Thursday, 08-DEC-2022

Set Temperature : OFF

Time Delay : Disabled

Delay between Measurement : Disabled

| <u>n</u>    | <u>Average</u>   | <u>Std.Dev.</u> | <u>% RSD</u>  | <u>Maximum</u> | <u>Minimum</u> |               |              |                     |              |
|-------------|------------------|-----------------|---------------|----------------|----------------|---------------|--------------|---------------------|--------------|
| 5           | -102.07          | 0.58            | -0.56         | -101.50        | -103.00        |               |              |                     |              |
| <u>S.No</u> | <u>Sample ID</u> | <u>Time</u>     | <u>Result</u> | <u>Scale</u>   | <u>OR °Arc</u> | <u>WLG.nm</u> | <u>Lg.mm</u> | <u>Conc.g/100ml</u> | <u>Temp.</u> |
| 1           | GL-71            | 08:26:55 PM     | -102.17       | SR             | -0.0613        | 589           | 100.00       | 0.060               | 18.5         |
| 2           | GL-71            | 08:27:03 PM     | -103.00       | SR             | -0.0618        | 589           | 100.00       | 0.060               | 18.5         |
| 3           | GL-71            | 08:27:12 PM     | -102.00       | SR             | -0.0612        | 589           | 100.00       | 0.060               | 18.4         |
| 4           | GL-71            | 08:27:20 PM     | -101.50       | SR             | -0.0609        | 589           | 100.00       | 0.060               | 18.4         |
| 5           | GL-71            | 08:27:28 PM     | -101.67       | SR             | -0.0610        | 589           | 100.00       | 0.060               | 18.4         |

Figure S14. UV spectrum of 1

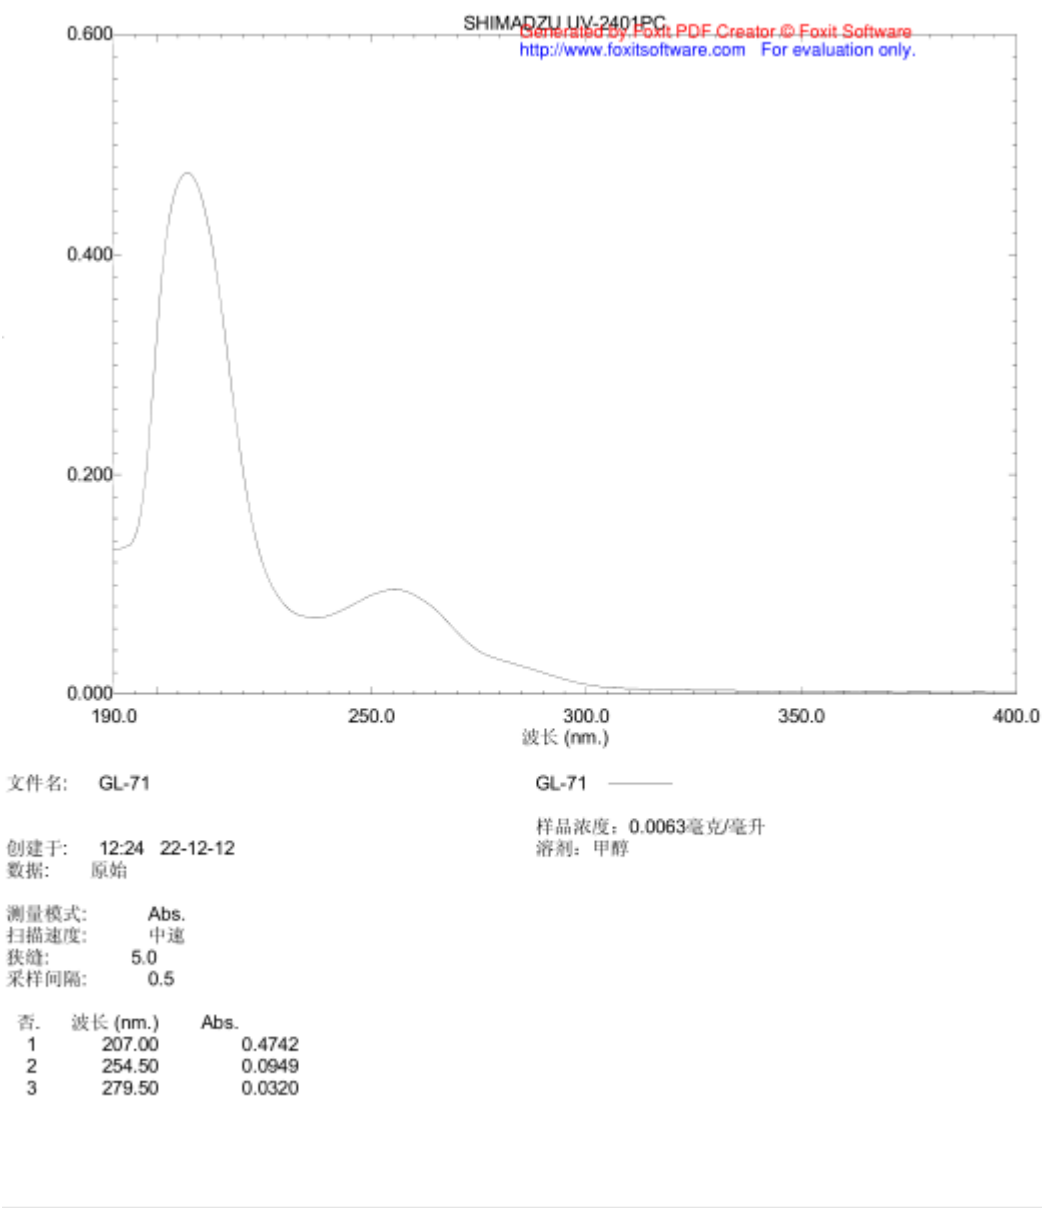



**Figure S15. IR spectrum of 1**

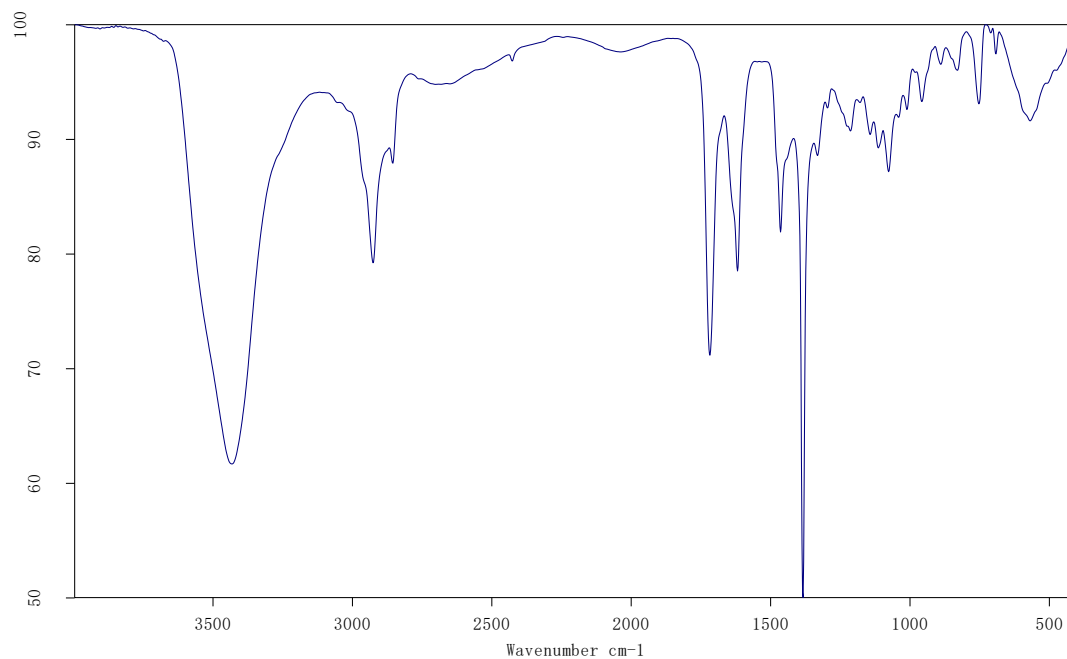

Sample Name: GL-71  
Sample Form: KBr  
Path of File: E:\data  
Date of Measurement: 2022/11/29

Resolution: 4  
Aperture Setting: 6 mm  
Number of Background Scans: 16  
Number of Sample Scans: 16

Beamsplitter Setting: KBr  
Source Setting: MIR  
Instrument Type: BRUKER VERTEX 70  
Soft Version: OPUS8.1

Figure S16. ECD spectrum of 1

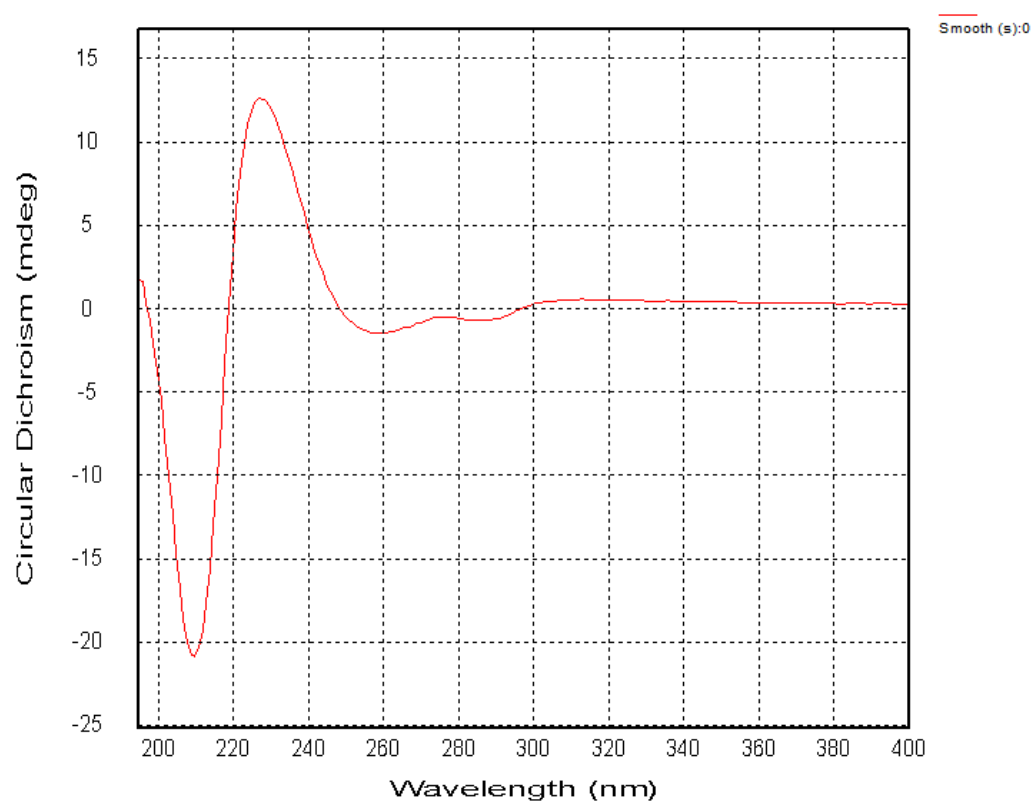

Figure S17.  $^1\text{H}$  NMR spectrum of **2** ( $\text{CD}_3\text{OD}$ , 400 MHz)

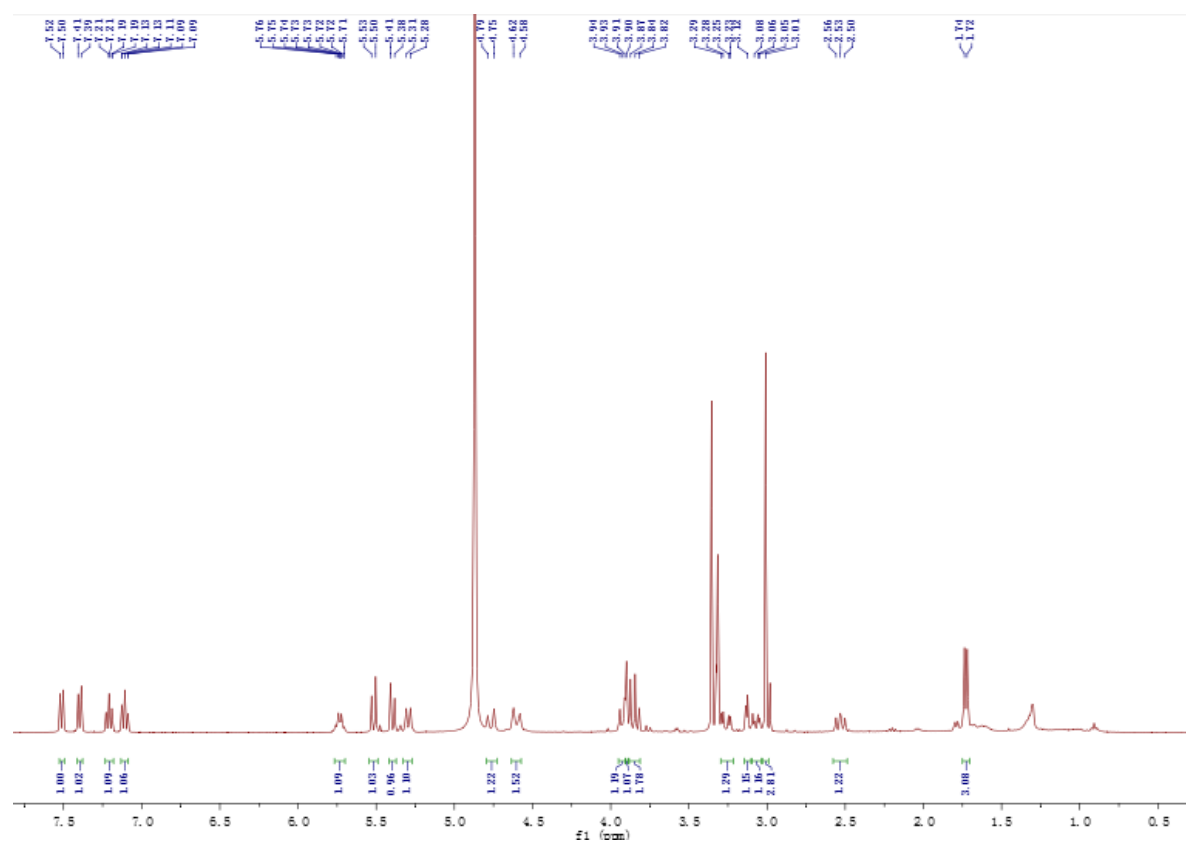

Figure S18.  $^{13}\text{C}$  NMR spectrum of **2** ( $\text{CD}_3\text{OD}$ , 100 MHz)

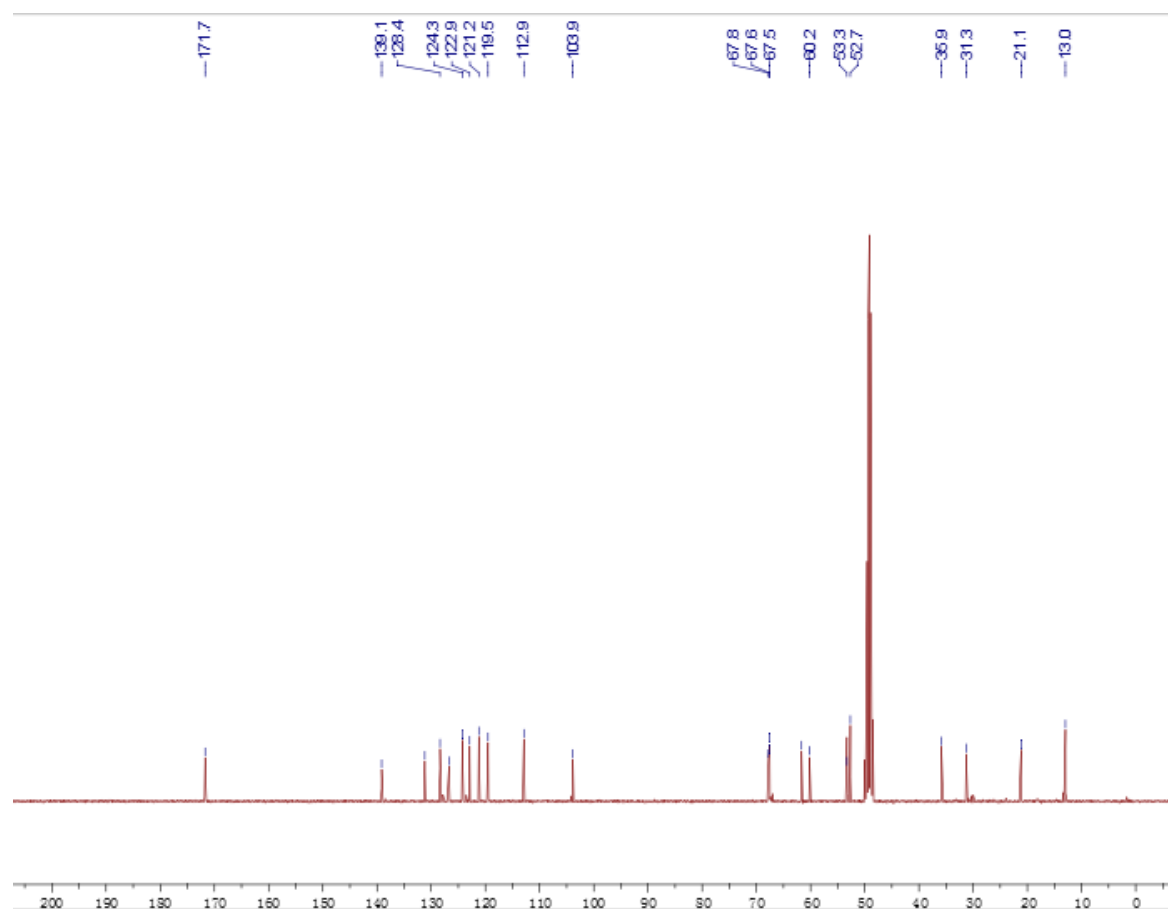

Figure S19. HSQC spectrum of **2** (CD<sub>3</sub>OD, 400 MHz).

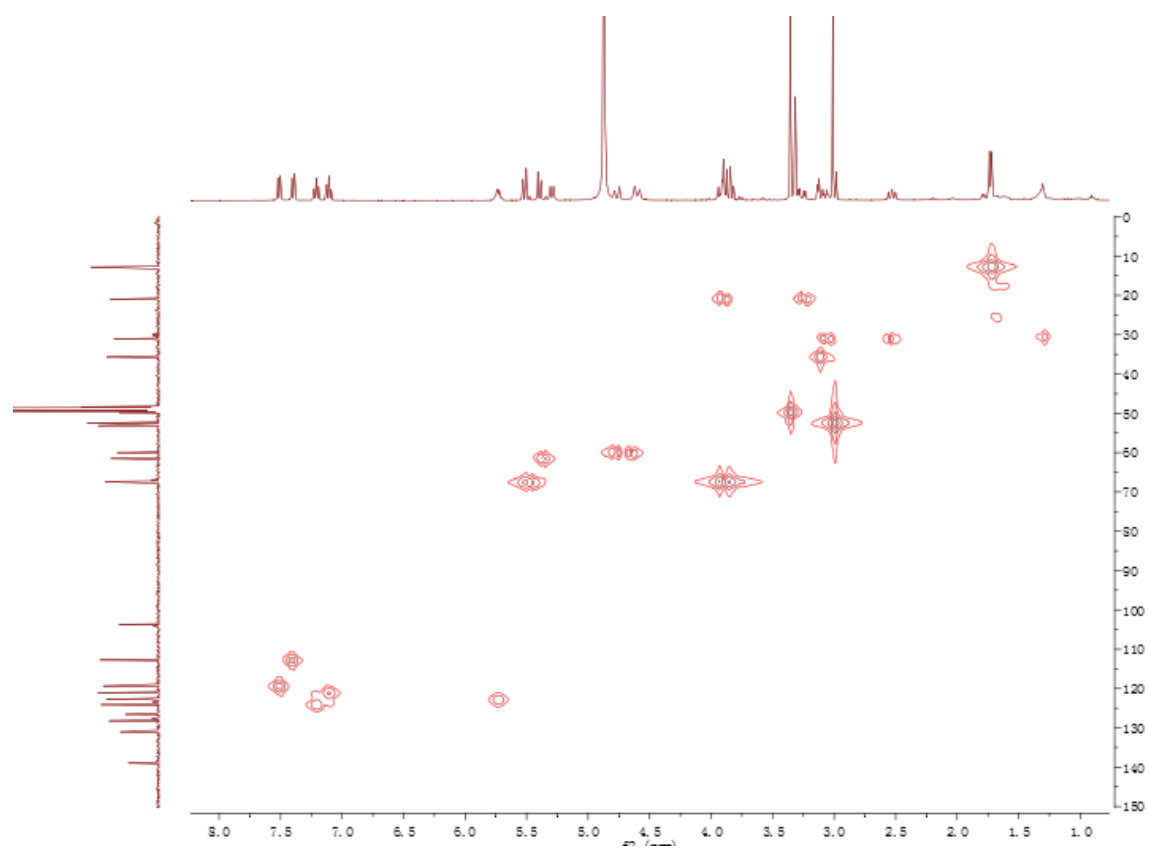

Figure S20. HMBC spectrum of **2** (CD<sub>3</sub>OD, 400 MHz).

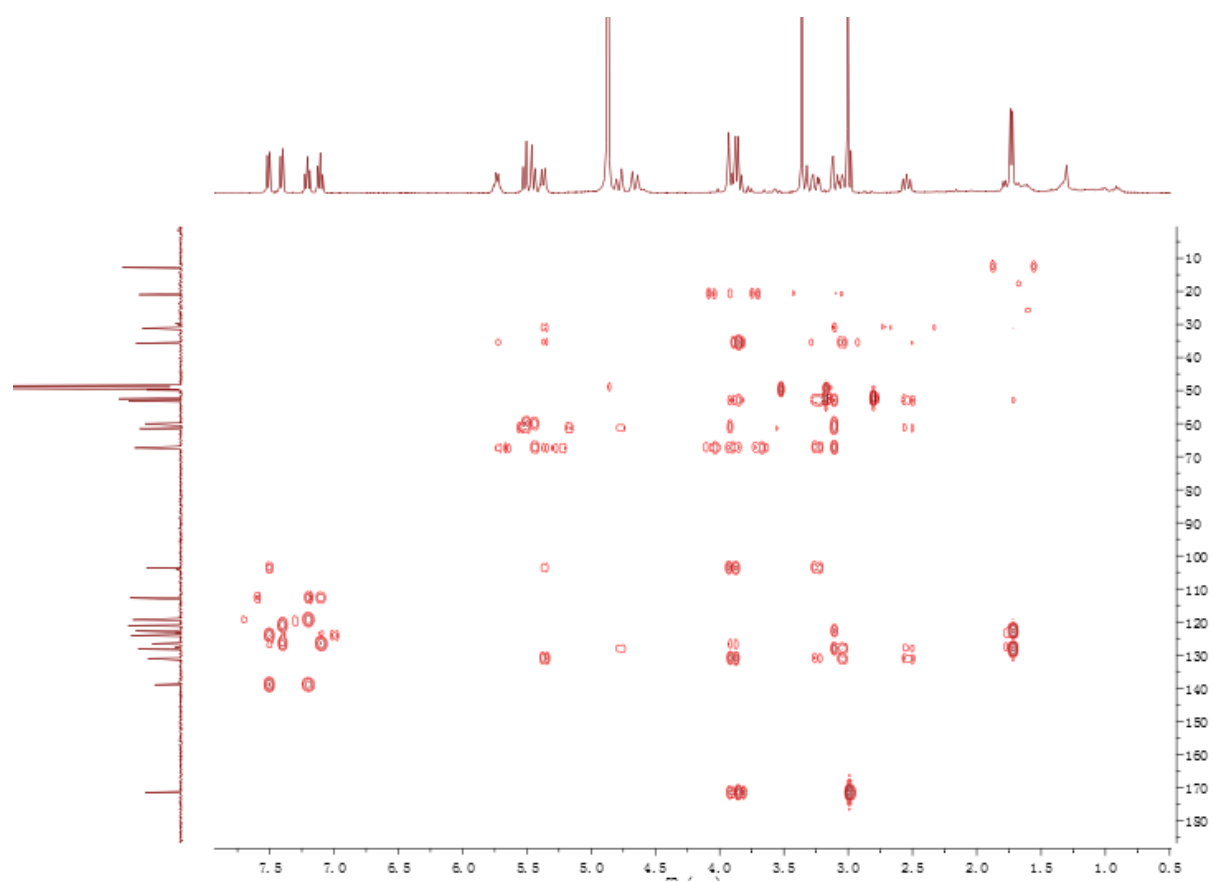

Figure S21. ROESY spectrum of **2** (CD<sub>3</sub>OD, 400 MHz).

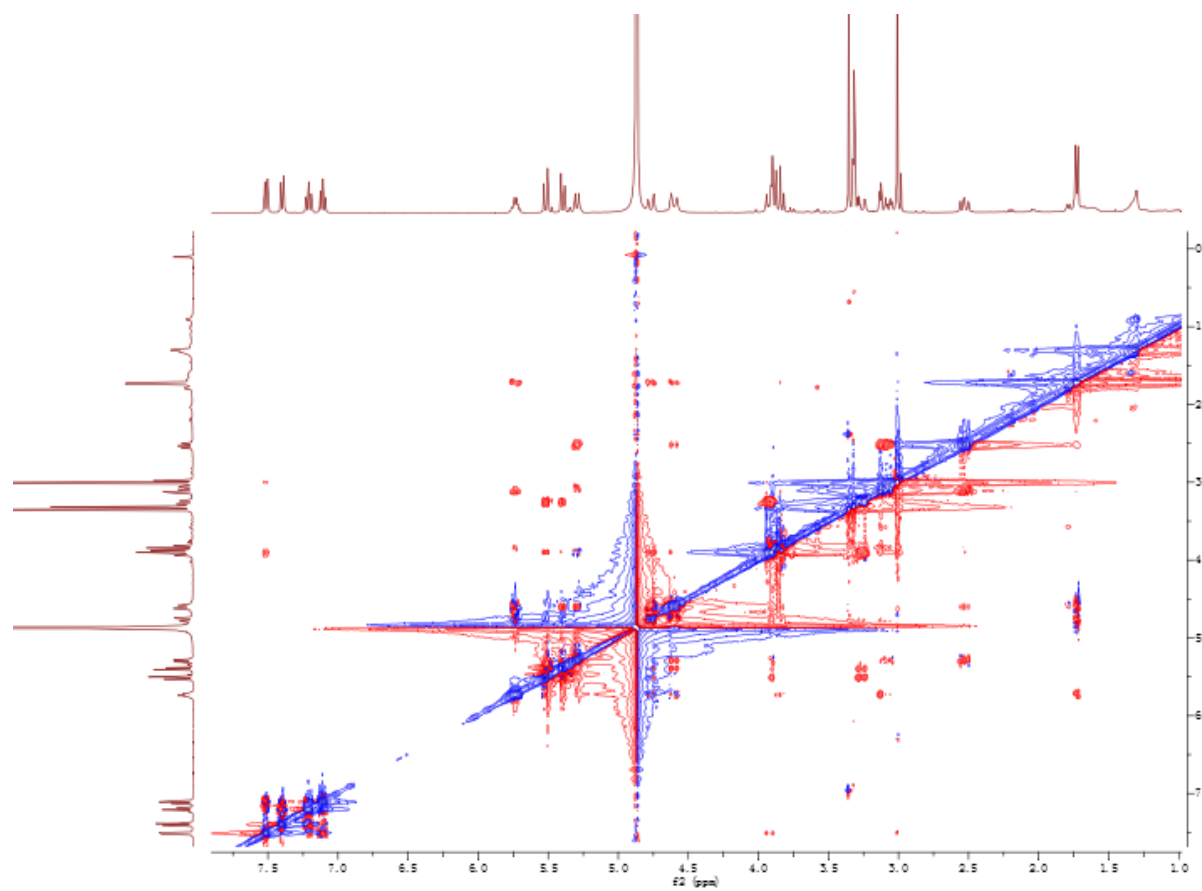

Figure S22.  $^1\text{H}$ - $^1\text{H}$  spectrum of 2 ( $\text{CD}_3\text{OD}$ , 400 MHz).

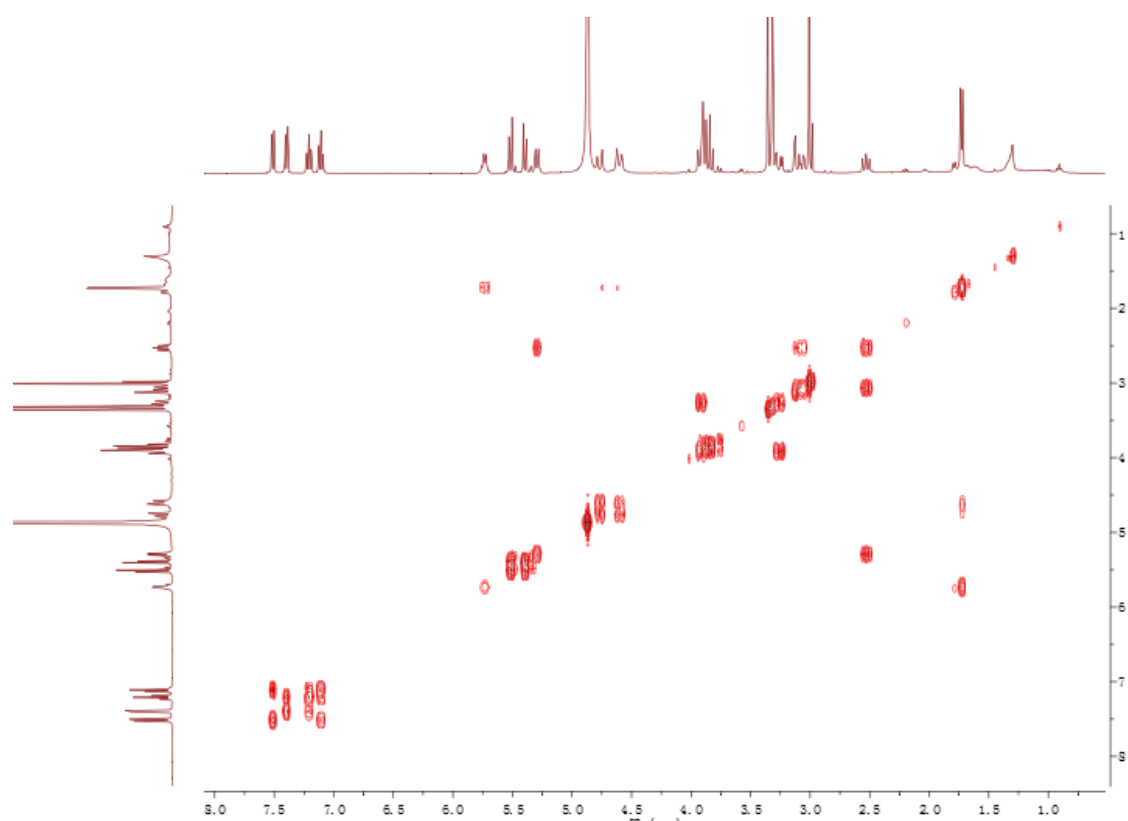



Figure S23. HR-ESI-MS spectrum of 2

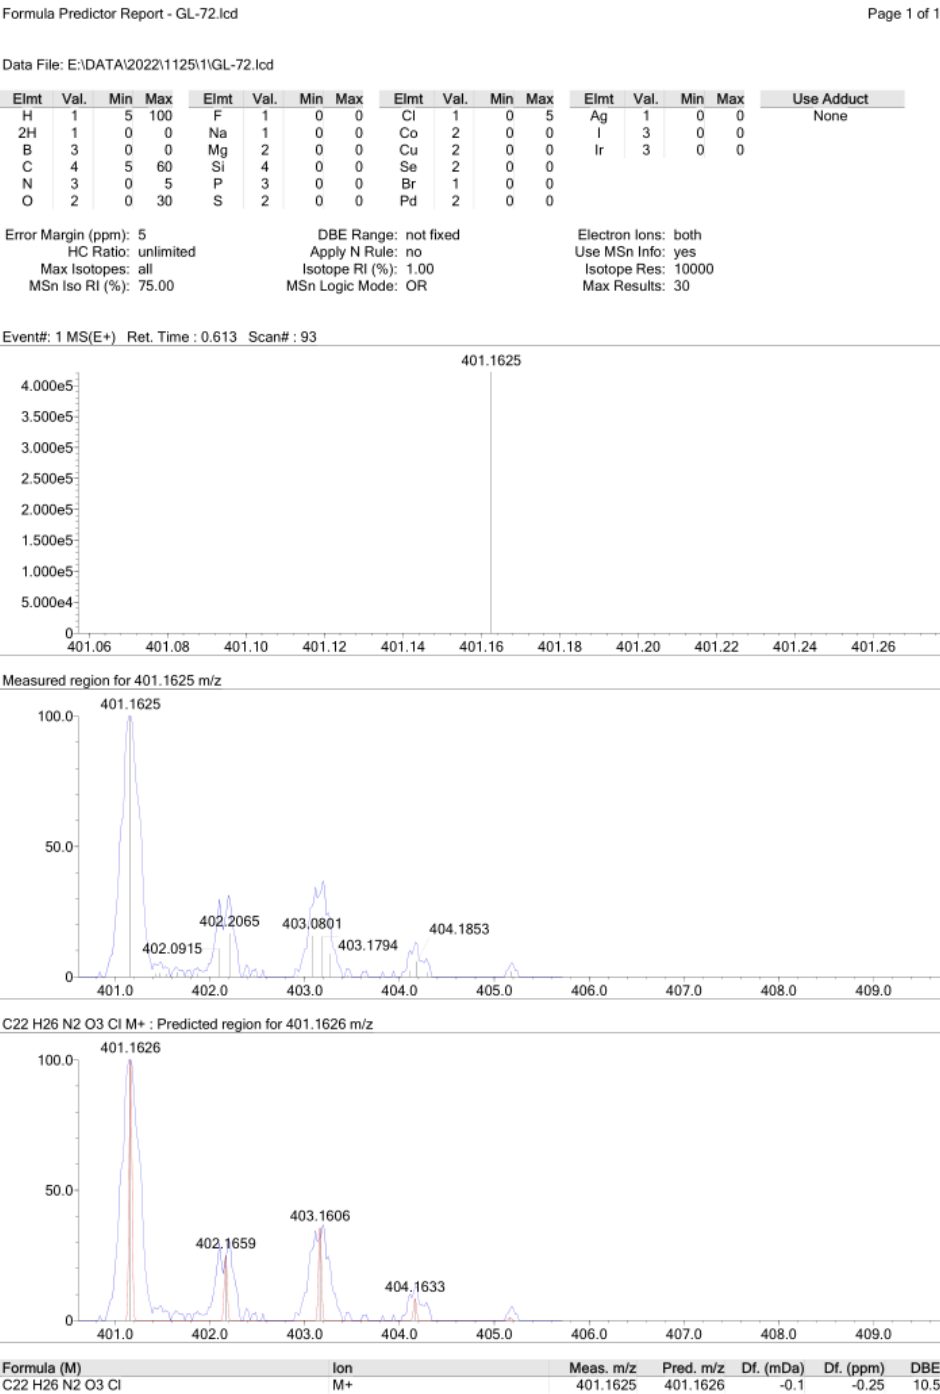

**Figure S24. ORD spectrum of 2**

**Rudolph Research Analytical**

This sample was measured on an Autopol VI, Serial #91058  
Manufactured by Rudolph Research Analytical, Hackettstown, NJ, USA.

Measurement Date : Thursday, 08-DEC-2022

Set Temperature : OFF

Time Delay : Disabled

Delay between Measurement : Disabled

| <u>n</u>    | <u>Average</u>   | <u>Std.Dev.</u> | <u>% RSD</u>  | <u>Maximum</u> | <u>Minimum</u> |               |              |                     |              |  |
|-------------|------------------|-----------------|---------------|----------------|----------------|---------------|--------------|---------------------|--------------|--|
| 5           | -18.06           | 1.05            | -5.81         | -16.57         | -19.25         |               |              |                     |              |  |
| <u>S.No</u> | <u>Sample ID</u> | <u>Time</u>     | <u>Result</u> | <u>Scale</u>   | <u>OR °Arc</u> | <u>WLG.nm</u> | <u>Lg.mm</u> | <u>Conc.g/100ml</u> | <u>Temp.</u> |  |
| 1           | GL-72            | 08:21:07 PM     | -19.25        | SR             | -0.0129        | 589           | 100.00       | 0.067               | 18.5         |  |
| 2           | GL-72            | 08:21:15 PM     | -18.06        | SR             | -0.0121        | 589           | 100.00       | 0.067               | 18.5         |  |
| 3           | GL-72            | 08:21:24 PM     | -16.57        | SR             | -0.0111        | 589           | 100.00       | 0.067               | 18.5         |  |
| 4           | GL-72            | 08:21:32 PM     | -17.61        | SR             | -0.0118        | 589           | 100.00       | 0.067               | 18.5         |  |
| 5           | GL-72            | 08:21:40 PM     | -18.81        | SR             | -0.0126        | 589           | 100.00       | 0.067               | 18.5         |  |

Figure S25. UV spectrum of 2

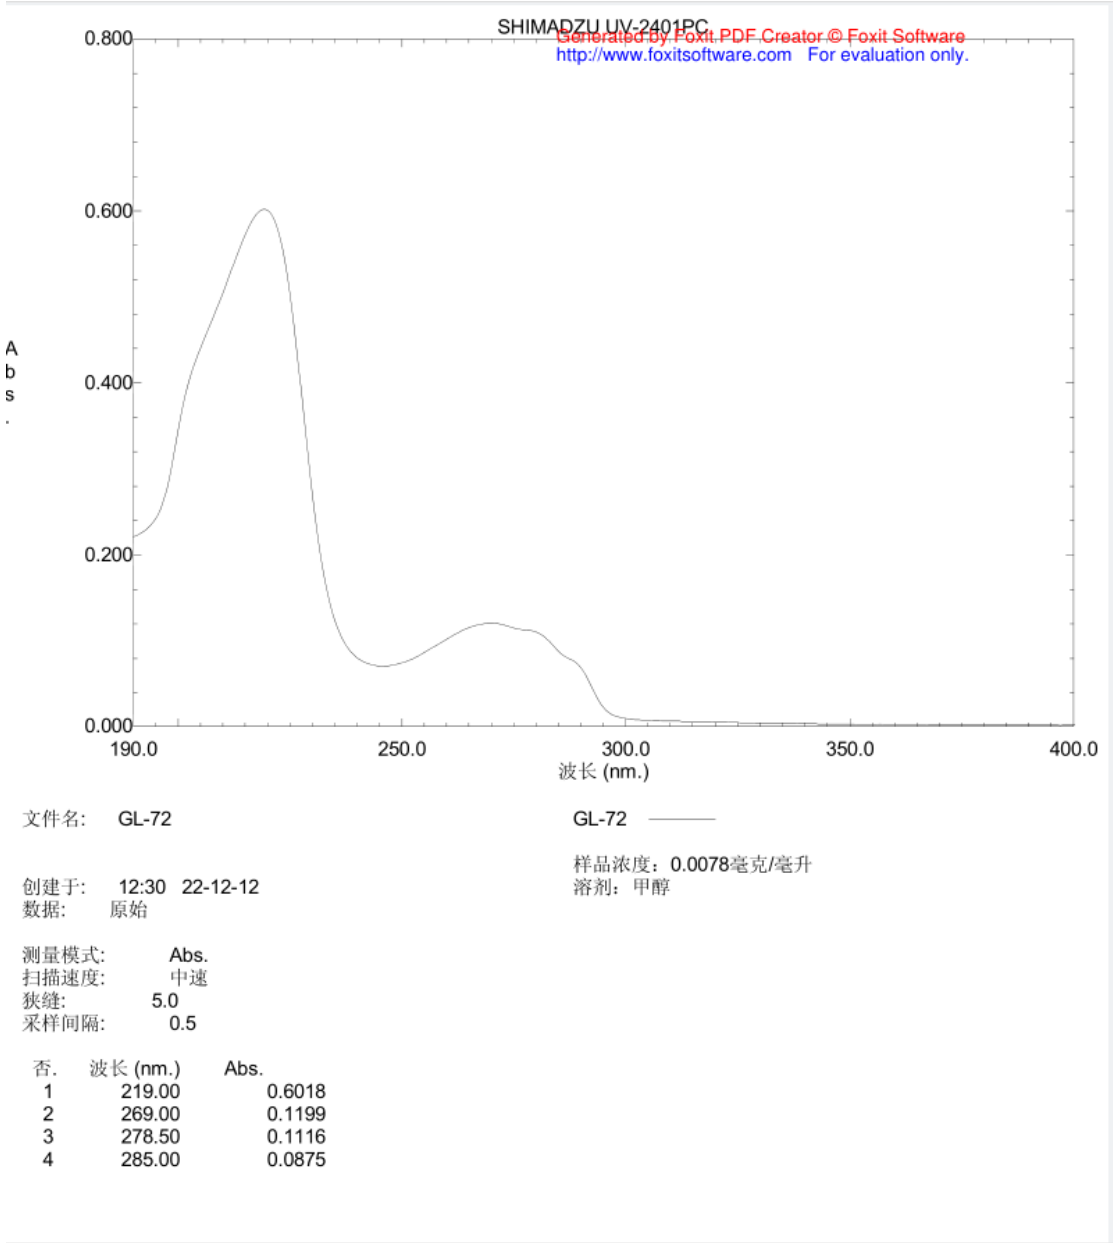

**Figure S26. IR spectrum of 2**

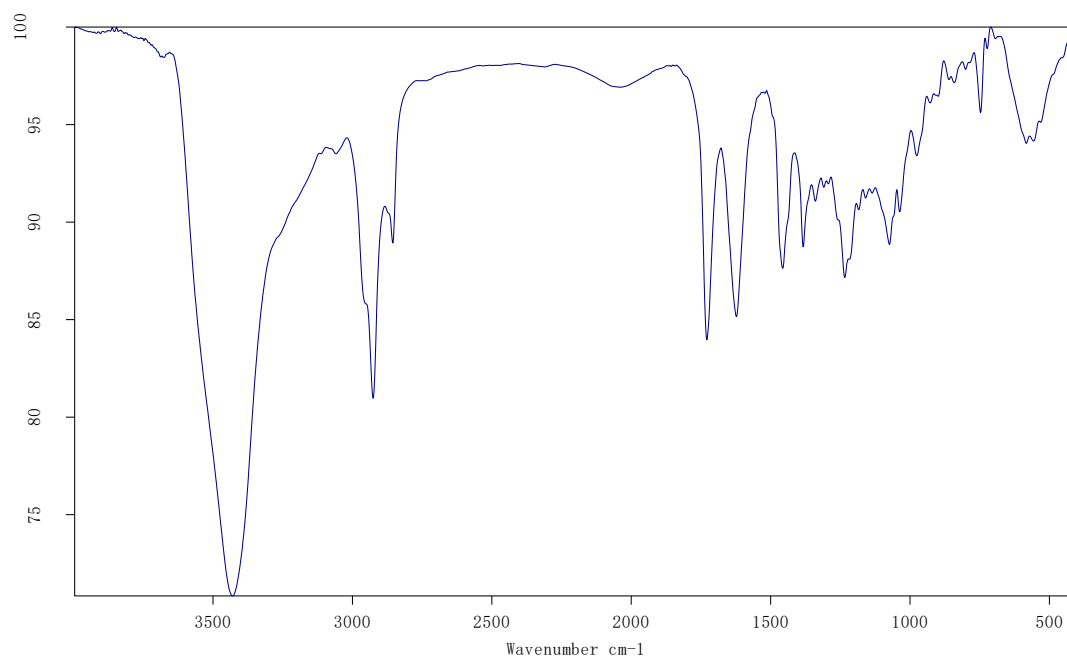

Sample Name: GL-72

Sample Form: KBr

Path of File: E:\data

Date of Measurement: 2022/11/29

Resolution: 4

Aperture Setting: 6 mm

Number of Background Scans: 16

Number of Sample Scans: 16

Beamsplitter Setting: KBr

Source Setting: MIR

Instrument Type: BRUKER VERTEX 70

Soft Version: OPUS8.1

Figure S27. ECD spectrum of 2

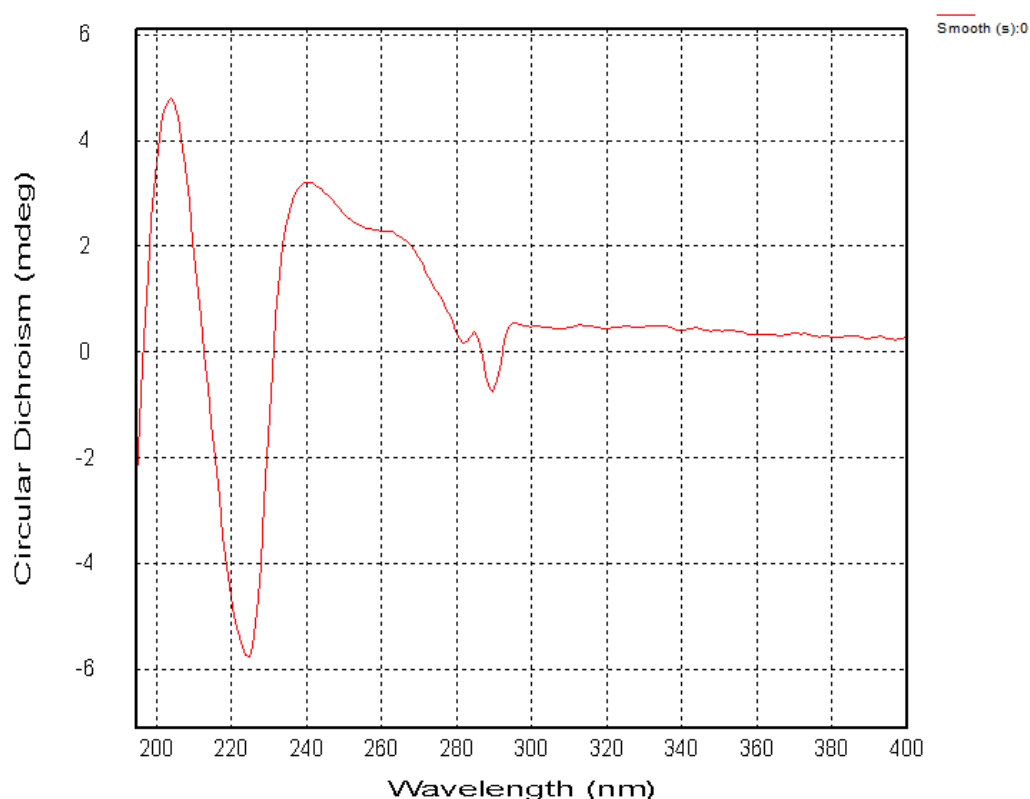

## References

(1) Noel M OBoyle, Tim V, ermeersch, Christopher J Flynn, Anita R Maguire Maguire, and Geoffrey R Hutchison. Confab - systematic generation of diverse low-energy conformers. *Journal of Cheminformatics*, 3:3–8, March 2011.

(2) M. J. Frisch, G. W. Trucks, H. B. Schlegel, G. E. Scuseria, M. A. Robb, J. R. Cheeseman, G. Scalmani, V. Barone, B. Mennucci, G. A. Petersson, H. Nakatsuji, M. Caricato, X. Li, H. P. Hratchian, A. F. Izmaylov, J. Bloino, G. Zheng, J. L. Sonnenberg, M. Hada, M. Ehara, K. Toyota, R. Fukuda, J. Hasegawa, M. Ishida, T. Nakajima, Y. Honda, O. Kitao, H. Nakai, T. Vreven, J. A. Montgomery, Jr., J. E. Peralta, F. Ogliaro, M. Bearpark, J. J. Heyd, E. Brothers, K. N. Kudin, V. N. Staroverov, R. Kobayashi, J. Normand, K. Raghavachari, A. Rendell, J. C. Burant, S. S. Iyengar, J. Tomasi, M. Cossi, N. Rega, J. M. Millam, M. Klene, J. E. Knox, J. B. Cross, V. Bakken, C. Adamo, J. Jaramillo, R. Gomperts, R. E. Stratmann, O. Yazyev, A. J. Austin, R. Cammi, C. Pomelli, J. W. Ochterski, R. L. Martin, K. Morokuma, V. G. Zakrzewski, G. A. Voth, P. Salvador, J. J. Dannenberg, S. Dapprich, A. D. Daniels, O. Farkas, J. B. Foresman, J. V. Ortiz, J. Cioslowski, and D. J. Fox. Gaussian 09 Revision D.01. Gaussian Inc. Wallingford CT 2009.
